# Supplementary material for: Sexual health promotion for sexual and gender minorities in primary care: a scoping review protocol
Source: PubMed Central journal article supplement — BMJ Open. 2023 Mar 3;13(3):e066704. doi: 10.1136/bmjopen-2022-066704 (PMC9990650; doi:10.1136/bmjopen-2022-066704), 2023-03-03

# BMJ Open

BMJ Open is committed to open peer review. As part of this commitment we make the peer review history of every article we publish publicly available.

When an article is published we post the peer reviewers' comments and the authors' responses online. We also post the versions of the paper that were used during peer review. These are the versions that the peer review comments apply to.

The versions of the paper that follow are the versions that were submitted during the peer review process. They are not the versions of record or the final published versions. They should not be cited or distributed as the published version of this manuscript.

BMJ Open is an open access journal and the full, final, typeset and author-corrected version of record of the manuscript is available on our site with no access controls, subscription charges or pay-per-view fees (<http://bmjopen.bmj.com>).

If you have any questions on BMJ Open's open peer review process please email [info.bmjopen@bmj.com](mailto:info.bmjopen@bmj.com)

# BMJ Open

## Sexual Health Promotion for Sexual and Gender Minorities in Primary Care: A Scoping Review Protocol

|                               |                                                                                                                                                                                                                                                                                                                                                                                                                                                                                                                                                                                                                                                                                                                                                                                                                                                                                                                                                                                                                                                                                                                                                                                                                                                                                                                                                                                                                                                                               |
|-------------------------------|-------------------------------------------------------------------------------------------------------------------------------------------------------------------------------------------------------------------------------------------------------------------------------------------------------------------------------------------------------------------------------------------------------------------------------------------------------------------------------------------------------------------------------------------------------------------------------------------------------------------------------------------------------------------------------------------------------------------------------------------------------------------------------------------------------------------------------------------------------------------------------------------------------------------------------------------------------------------------------------------------------------------------------------------------------------------------------------------------------------------------------------------------------------------------------------------------------------------------------------------------------------------------------------------------------------------------------------------------------------------------------------------------------------------------------------------------------------------------------|
| Journal:                      | <i>BMJ Open</i>                                                                                                                                                                                                                                                                                                                                                                                                                                                                                                                                                                                                                                                                                                                                                                                                                                                                                                                                                                                                                                                                                                                                                                                                                                                                                                                                                                                                                                                               |
| Manuscript ID                 | bmjopen-2022-066704                                                                                                                                                                                                                                                                                                                                                                                                                                                                                                                                                                                                                                                                                                                                                                                                                                                                                                                                                                                                                                                                                                                                                                                                                                                                                                                                                                                                                                                           |
| Article Type:                 | Protocol                                                                                                                                                                                                                                                                                                                                                                                                                                                                                                                                                                                                                                                                                                                                                                                                                                                                                                                                                                                                                                                                                                                                                                                                                                                                                                                                                                                                                                                                      |
| Date Submitted by the Author: | 21-Jul-2022                                                                                                                                                                                                                                                                                                                                                                                                                                                                                                                                                                                                                                                                                                                                                                                                                                                                                                                                                                                                                                                                                                                                                                                                                                                                                                                                                                                                                                                                   |
| Complete List of Authors:     | <p>Homme, Paige; Li Ka Shing Knowledge Institute, St. Michael's Hospital, Unity Health Toronto, MAP Centre for Urban Health Solutions; University of Toronto, Temerty Faculty of Medicine</p> <p>Truong, Robinson; Li Ka Shing Knowledge Institute, St. Michael's Hospital, Unity Health Toronto, MAP Centre for Urban Health Solutions; University of Toronto, Temerty Faculty of Medicine</p> <p>Gong, Jenny; University of Toronto Dalla Lana School of Public Health; University of Oxford Nuffield Department of Population Health</p> <p>Ziegler, Carolyn; Unity Health Toronto, Library Services</p> <p>Freitas, Cassandra; Li Ka Shing Knowledge Institute, St. Michael's Hospital, Unity Health Toronto, MAP Centre for Urban Health Solutions; University of Toronto Dalla Lana School of Public Health</p> <p>Yeung, Anna; Li Ka Shing Knowledge Institute, St. Michael's Hospital, Unity Health Toronto, MAP Centre for Urban Health Solutions</p> <p>Tan, Darrell; Li Ka Shing Knowledge Institute, St. Michael's Hospital, Unity Health Toronto, MAP Centre for Urban Health Solutions; Unity Health Toronto, Division of Infectious Diseases, St. Michael's Hospital</p> <p>Burchell, Ann; Li Ka Shing Knowledge Institute, St. Michael's Hospital, Unity Health Toronto, Department of Family and Community Medicine and Centre for Research on Inner City Health; University of Toronto Faculty of Medicine, Department of Family and Community Medicine</p> |
| Keywords:                     | SEXUAL MEDICINE, HIV & AIDS < INFECTIOUS DISEASES, PRIMARY CARE                                                                                                                                                                                                                                                                                                                                                                                                                                                                                                                                                                                                                                                                                                                                                                                                                                                                                                                                                                                                                                                                                                                                                                                                                                                                                                                                                                                                               |
|                               |                                                                                                                                                                                                                                                                                                                                                                                                                                                                                                                                                                                                                                                                                                                                                                                                                                                                                                                                                                                                                                                                                                                                                                                                                                                                                                                                                                                                                                                                               |

SCHOLARONE™  
Manuscripts

Running head: Sexual health promotion for SGM in primary care

**Sexual Health Promotion for Sexual and Gender Minorities in Primary Care: A Scoping  
Review Protocol**

Paige HOMME\*<sup>1,2</sup>, Robinson TRUONG\*<sup>1,2</sup>, Jenny GONG<sup>1,3,8</sup>, Carolyn ZIEGLER<sup>7</sup>, Cassandra  
FREITAS<sup>1,3</sup>, Anna YEUNG<sup>1</sup>, Darrell H.S. TAN<sup>1,2,4,5</sup> & Ann N. BURCHELL<sup>1,2,3,6</sup>

\*Equal contributing authors

1. MAP Centre for Urban Health Solutions, St. Michael's Hospital, Unity Health Toronto
2. Temerty Faculty of Medicine, University of Toronto
3. Dalla Lana School of Public Health, University of Toronto
4. Division of Infectious Diseases, St. Michael's Hospital, Unity Health Toronto
5. Department of Medicine, St. Michael's Hospital, Unity Health Toronto
6. Department of Family and Community Medicine, St. Michael's Hospital, Unity Health  
Toronto
7. Library Services, Unity Health Toronto
8. Nuffield Department of Population Health, University of Oxford

**Corresponding author**

Ann N. Burchell

MAP Centre for Urban Health Solutions and Department of Family and Community Medicine,  
St. Michael's Hospital, Unity Health Toronto; Temerty Faculty of Medicine and Dalla Lana  
School of Public Health, University of Toronto

[ann.burchell@unityhealth.to](mailto:ann.burchell@unityhealth.to)

**SHORT TITLE**

SGM health promotion in primary care

Word Count: 2616/4000

**KEYWORDS**

Sexual medicine, HIV & AIDS < infectious diseases, primary care

Running head: Sexual health promotion for SGM in primary care

## **ABSTRACT**

**Introduction:** Sexual and gender minorities (SGM) face health disparities related to systemic discrimination and barriers to sexual health. Sexual health promotion encompasses strategies that enable individuals, groups, and communities to make informed decisions regarding their sexual well-being. Our objective is to describe the existing sexual health promotion interventions tailored for SGMs within the primary care context.

**Methods and analysis:** We will conduct a scoping review and search for articles in eleven medical and social science academic databases on interventions that are targeted towards SGM in the primary care context in industrialized countries. We defined sexual health interventions in the inclusion framework as 1) promote positive sexual health, or sex and relationship education; 2) reduce the incidence of STIs; 3) reduce unintended pregnancies; or 4) change prejudice, stigma, and discrimination around sexual health, or increase awareness surrounding positive sex. Two independent reviewers will select articles meeting inclusion criteria and extract data. Participant and study characteristics will be summarized using frequencies and proportions. Our primary analysis will include a descriptive summary of key interventional themes from content and thematic analysis. Gender-based Analysis Plus (GBA+) will be used to stratify themes based on gender, race, sexuality, and other identities. The secondary analysis will include the use of the Sexual and Gender Minority Disparities Research Framework to analyze the interventions from a social-ecological perspective.

**Ethics and dissemination:** No ethical approval is required for a scoping review. The protocol was registered on the Open Science Framework Registries (<https://doi.org/10.17605/OSF.IO/X5R47>). The intended audiences are primary care providers, public health, researchers, and community-based organizations. Results will be communicated through peer review publication, conferences, rounds, and other opportunities to reach primary care providers. Community-based engagement will occur through presentations, guest speakers, community forums and research summary handouts.

### **Strengths and limitations of this study**

- The research question was kept broad to capture the diversity of sexual health promotion in primary care.
- Focuses on interventions that can inspire and be utilized by primary care providers for sexual and gender minority patients.
- Includes both peer-reviewed and grey literature, with the intention of keeping the scope broad.
- Narrow definition of sexual health promotion interventions and definition of primary care.
- Focuses on only developed countries according to the United Nations Report 2019, leading to exclusion of studies and may reduce generalizability to other care contexts.

Running head: Sexual health promotion for SGM in primary care

## **INTRODUCTION**

The term “sexual and gender minorities” encompasses identities such as Two-Spirited, lesbian, gay, bisexual, transgender, queer, questioning, intersex and asexual (2SLGBTQQIA+) individuals that represent a diverse group of people and communities with intersecting identities such as race, socioeconomic status and others<sup>3</sup>. These intersecting identities and backgrounds define unique identity locations that influence experiences of stigma and discrimination in the healthcare system<sup>13</sup>. Sexual and gender minority individuals face health disparities<sup>1</sup>, including access to health care, discrimination by health providers, postponing or not attempting to seek care, and access to health insurance<sup>2,3</sup>. Furthermore, minority stress theory suggests that sexual minority individuals face more exposure to social stress related to stigma, prejudice and discrimination and therefore are at greater risk for negative physical and mental health outcomes, compared to their heterosexual counterparts<sup>14</sup>.

Sexual health remains a significant public health challenge around the world and continues to impact Western industrialized countries<sup>4</sup>. Approximately one million people around the world acquire a STI every day, and the resulting morbidity and mortality compromises individual quality of life as well as overall sexual and reproductive health<sup>15,16</sup>. Though many definitions of sexual health have been proposed<sup>17</sup>, the most cited and widely accepted is the World Health Organization definition: “a state of physical, emotional, mental, and social well-being in relation to sexuality; it is not merely the absence of disease, dysfunction, or infirmity.”<sup>18</sup> Sexual and gender minorities face varying sexual health issues. For example, sexual minority women are more likely to report sexually transmitted infections (STIs) and unintended pregnancies compared to their heterosexual counterparts<sup>19</sup>. Cis- and transgender gay, bisexual, and other men who have sex with men (GBMSM) are at particularly high risk for acquiring HIV<sup>20</sup>. Transmasculine individuals have a significantly reduced odds of undergoing cervical cancer screening as compared to cis-women<sup>21,22</sup>. To reduce the global burden of STIs, WHO’s *Global Health Sector Strategy on Sexually Transmitted Infections* Report points to the need to adopt appropriate interventions aimed to promote sexual health<sup>16</sup>.

Sexual health promotion encompasses strategies that enable individuals, groups, and communities to make informed decisions regarding their sexual well-being<sup>18</sup>. These strategies often focus on intervening at the individual level, through the provision of educational, peer-based, motivational, or skills-based programs<sup>5</sup>. From social-ecological perspective, sexual health and sexual behaviour change takes place within five nested, interacting environmental levels with the individual at the centre<sup>24–26</sup>. The individual and the surrounding microsystem represent the most immediate environment and factors that drive health disparities and unmet care needs<sup>26</sup>. The mesosystem is the relationship between the health provider and patient and the ecosystem encompasses health system policies, decisions made among health providers and insurance<sup>26</sup>. The macrosystem is the broader cultural environment that influences stigma and discrimination and the chronosystem describes how location in time and place impacts the individual<sup>26</sup>. It is important to examine sexual health promotion interventions that move beyond the individual level to address multiple domains as they have the potential to further improve sustainable behaviour change and positive sexual health outcomes<sup>27</sup>.

Primary care is uniquely situated to address many environments to positively influence sexual health of sexual and gender minority individuals; ranging from patient-level interaction,

Running head: Sexual health promotion for SGM in primary care

community-based interventions to targeted policy changes. Researchers advocate that primary health care environments are important settings for delivering routine sexual health promotion services<sup>28</sup>. Yet, though sexual health is recognized as an important topic within primary care, it is often overlooked in practice<sup>29</sup>. Specifically, Khan *et al.* (2008)<sup>30</sup> reported that many primary care providers do not discuss sexual health with their patients due to challenges integrating sexual health into their practice, citing heavy workloads, lack of time, and inadequate training as barriers<sup>9</sup>. In the context of sexual and gender minority patients, lack of knowledge and understanding is cited as a barrier to ask about a patient's gender, sexuality and sexual health<sup>26</sup>.

The objective of this scoping review is to synthesize what evidence currently exists regarding sexual health promotion interventions for sexual and gender minorities in the primary care context, to examine the landscape of the literature and to map out existing and promising areas of priority, improvement, and future research.

## **METHODS AND ANALYSIS**

Our scoping review approach is informed by frameworks proposed by Arksey and O'Malley (2002)<sup>6</sup>, Levac *et al.* (2010)<sup>7</sup>, and the Joanna Briggs Institute<sup>8</sup>. These researchers outlined six stages involved in conducting a rigorous scoping review: 1) identifying the research question; 2) identifying relevant studies; 3) selecting relevant studies; 4) charting data; 5) summarizing and reporting findings and 6) an optional consultation exercise. In addition, we utilize the Preferred Reporting Items for Systematic reviews and Meta-Analyses extension for Scoping Reviews (PRISMA-ScR) Checklist in developing this protocol as it the most used and widely accepted standard of reporting scoping reviews<sup>31-33</sup>. The scoping review protocol was registered on the Open Science Framework Registries (DOI: 10.17605/OSF.IO/X5R47)

### **Patient and public involvement**

No patients were involved in this scoping review.

### **Eligibility Criteria**

#### *Participants*

Our focus will be on studies involving interventions targeted towards youth and adult sexual and gender minorities, including but not limited to those who identify as Two Spirit, lesbian, gay, bisexual, transgender, transsexual, queer, questioning, intersex, and asexual. We will include studies that targeted sexual and gender minorities populations who may also benefit from the intervention. Conversely, we will exclude studies that included sexual and gender minority individuals along with other groups of interest or the general population without clear targeting or intention to focus on sexual and gender minorities. We will exclude interventions targeting children under the age of 12.

#### *Concept*

This review will be inclusive of studies that examine a wide range of sexual health promotion interventions based in the primary care contexts. For this review, we will adapt the definition of sexual health promotion employed by Thompson *et al.* (2008)<sup>9</sup>, wherein the term encompasses, but is not limited to, any activity that: 1) promotes positive sexual health, or sex and relationship education; 2) reduces the incidence of STIs (including HIV); 3) reduces unintended pregnancies;

Running head: Sexual health promotion for SGM in primary care

4) changes prejudice, stigma and discrimination, or increases awareness surrounding positive sex.

### *Context*

Our context is the primary care setting, which includes “first-contact services” such as general practitioners or family medicine clinics, pharmacies, tele-health, outpatient clinics, community or venue-based clinics, sexual health clinics, and other clinical settings that does not consider patients as “inpatients”<sup>10</sup>. We will include research based in both “general practice” and “family medicine” since these terms are synonymous with primary care and may be used interchangeably in literature<sup>34</sup>. We will restrict our focus to studies conducted in “economically developed” nations, as defined by the 2019 United Nations World Economic Situation Prospects report classifications (Appendix 1, Table 1)<sup>35</sup>.

### *Types of studies*

Studies using any study design will be eligible, including but not limited to systematic reviews, randomized controlled trials, quasi-experimental trials, cohort studies, case control studies, and cross-sectional studies. Mixed methods research and qualitative study designs such as phenomenological and ethnographic studies will also be included. For feasibility reasons, only articles published in English were included. We will restrict the review to articles published between the year 2000 to 2022, to maximize relevance to the current healthcare context. We will include conference articles, editorials and commentaries to better capture the scope of health promoting intervention.

### **Search strategy and Information Sources**

The search strategies will be developed iteratively by the team and carried out by an experienced medical librarian (CZ), utilizing a comprehensive range of medical subject headings and keyword each terms corresponding to our population (sexual and gender minorities), concept (sexual health promotion), and context (primary care in high income countries). The search strategies will be adapted for each database and will be limited English language articles published from 2000 to the present. In total, eleven databases will be searched for this review: Medline (Ovid), Embase (Ovid), PsycINFO (Ovid), CINAHL (EBSCOhost), the Cochrane Database of Systematic Reviews (Ovid), Cochrane Central Register of Controlled Trials (Ovid), Web of Science (Science Citation Index, Social Sciences Citation Index, Conference Proceedings Citation Index Science, Conference Proceedings Citation Index- Social Science & Humanities), Gender Studies Database & LGBTQ+ Source (EBSCOhost). The complete Ovid Medline search strategy is available in Appendix 2. All search strategies, exactly as run, will be made available upon publication of the final review. Additional search strategy that will be employed is cited reference searching of the systematic reviews that meet inclusion criteria.

### **Study selection**

Search results from each database will be compiled in EndNote and duplicates removed, then subsequently imported into the Covidence® software, software where any additional duplicate citations will be removed. Two reviewers will independently review titles and abstracts of each citation against the inclusion criteria. Conflicts will be resolved through discussion until consensus is reached or bringing in a third reviewer if necessary. Articles meeting the inclusion criteria will then move on to full text review by two independent reviewers. We will record

Running head: Sexual health promotion for SGM in primary care

reasons for excluding articles. Disagreements between the reviewers at the full text review process will be resolved through consensus where possible, or by the decision of a third reviewer if not. Articles that meet inclusion/exclusion criteria upon full text review will be imported into Covidence®. The results of the search and study selection process will be reported using a PRISMA flow diagram.

### **Data Extraction Process**

One reviewer will independently extract data, including article type, description of intervention, themes and subthemes, and participant descriptors, from the final eligible articles. We will pilot a draft extraction table on the first five eligible articles; table modifications will be made iteratively. A second reviewer will validate the accuracy of data extraction from the entire set of articles extracted by the first reviewer. Discrepancies will be discussed between the two reviewers until consensus is reached or by arbitration of a third reviewer, if necessary. Reviewers will attempt to contact study authors by email up to three attempts per article, to request missing or additional information if required.

### **Data Analysis and Presentation**

We will describe key characteristics of the included studies, including participants' gender, sexuality, race/ethnicity, age range, country of study. Results will be summarized as Tables and/or figures in the final scoping review article. After data extraction, we will conduct thematic analysis to identify major content area categories, themes, and subthemes of the interventions. We will use the Sexual and Gender Minority Disparities Research Framework from the NIH<sup>12</sup> to analyze the interventions from a social-ecological perspective in terms of individual, community, and policy, for example. We will apply Gender-based Analysis plus (GBA+)<sup>11</sup> to characterize gender, race, and sexuality data presented in the articles. These results will be quantified and presented in graph and tabular formats in the final review. Themes and sub-themes identified will be described in greater detail in narrative summaries.

### **Ethical Approval**

No ethical approval is required since our scoping review methods do not involve animals or human participants.

### **Discussion**

To our knowledge, this will be the first scoping review to describe the landscape of sexual health promotion based in primary care setting tailored to sexual and gender minorities. Primary care represents a key setting of inquiry because it captures many social-ecological levels of influence for positive and sustainable sexual health outcomes, ranging from individual and relational to policy<sup>24-27</sup>. Findings can ground the implementation and scale-up of evidence-based interventions and the development of novel interventions to support and foster positive sexual health in sexual and gender minorities communities.

Our scoping review approach has several strengths. Our comprehensive search strategy includes a wide range of primary research modalities using quantitative, qualitative, and mixed methods.



Running head: Sexual health promotion for SGM in primary care

1  
2  
3 Studies included in secondary research, e.g., systematic reviews, that fit the selection criteria will  
4 also be included. Additionally, our search parameters and definitions of primary care and sexual  
5 health promotion are broad to better capture the diversity of the literature. Our analysis strategy  
6 is similarly comprehensive and multi-faceted with analysis of themes and content, the  
7 participants, such as gender, sexuality, and race/ethnicity as well as a socio-ecological levels.  
8 This analysis will offer rich insights into the different dimensions of potential research findings  
9 of the content, context, and participants.  
10  
11

12 Nevertheless, there are limitations. Our restriction to studies in economically-developed  
13 countries may limit generalizability to low-income settings. Similarly, by restraining the scope to  
14 interventions that operate within or in close connection to primary care, we may select for more  
15 biomedical interventions such as STI and HIV testing. This may exclude studies that focus on  
16 sexuality, relationships, and behaviour-based change when these may operate in settings outside  
17 of primary care (e.g., community-based organizations, bath houses, and private counselling).  
18  
19  
20

### 21 **Conclusion and Dissemination**

22  
23  
24 Primary health care environments are well suited for creative and effective strategies for sexual  
25 health promotion that are tailored to sexual and gender minorities. The narrative descriptions,  
26 results and findings of this scoping review will help to identify areas of priority, improvement,  
27 and scale-up. By summarizing outcomes and success of interventions across key content themes  
28 results from our scoping review are expected to be of particular interest to primary care providers  
29 in high-income country settings. Public health policy experts and practitioners with a public  
30 health focus may find the anticipated results relating to the levels of interventions instructive.  
31 Community-based organizations that engage in sexual health promotion may benefit from new  
32 ideas suggested by the scoping review, or alternatively confirmation that existing strategies are  
33 evidence-based. Finally, gaps identified by the scoping review will provide opportunities for  
34 further work by researchers in the field, including development and trialing of new interventions  
35 within primary care environments for sexual and gender minorities.  
36  
37  
38  
39  
40  
41  
42  
43  
44  
45  
46  
47  
48  
49  
50  
51  
52  
53  
54  
55  
56  
57  
58  
59  
60

Running head: Sexual health promotion for SGM in primary care

### **AUTHOR'S CONTRIBUTIONS**

PH and RT contributed equally to this paper as co-first authors. All contributing authors have seen and approved the final submitted version of the manuscript. The contribution of work is as follows: ANB, DHST, and JG developed the study question; JG and RT designed the protocol with ANB and DHST; CZ for the data acquisition by creating and implementing the search strategy; PH, RT, JG, DHST and ANB wrote the original draft of the manuscript; all authors provided input and approved the final version of the manuscript.

### **FUNDING**

ANB is supported by a University of Toronto Department of Family and Community Medicine Non-Clinician Investigator award (N/A) and is a Canada Research Chair in Sexually Transmitted Infection Prevention (960-232826). D.H.S.T. is supported by a Tier 2 Canada Research Chair in HIV Prevention and STI Research (950-232641). Funding for development of the protocol was provided by the MAP Centre for Urban Health Solutions, St. Michael's Hospital, Unity Health Toronto (N/A), and a Canadian Institutes of Health Research foundation grant to ANB (FDN 148432).

### **COMPETING INTERESTS**

PH, RT, JG, CZ, CF, AY, and ANB have no conflicts of interest. D.H.S.T.'s institution has received investigator-initiated research grants from Abbvie, Gilead and Viiv Healthcare. D.H.S.T. is a Site Principal Investigator for clinical trials sponsored by GlaxoSmithKline.

Running head: Sexual health promotion for SGM in primary care

## **REFERENCES**

1. IOM (Institute of Medicine). *The Health of Lesbian, Gay, Bisexual, and Transgender People: Building a Foundation for Better Understanding*. (The National Academies Press).
2. National Healthcare Disparities Report 2011. (2012).
3. Daniel, H. *et al.* Lesbian, gay, bisexual, and transgender health disparities: Executive summary of a policy position paper from the American College of Physicians. *ANN INTERN MED* **163**, 135–137 (2015).
4. Ivankovich, M. B., Fenton, K. A. & Douglas, J. M. Considerations for National Public Health Leadership in Advancing Sexual Health. *PUBLIC HEALTH REP* **128**, 102–110 (2013).
5. Khalesi, Z. B., Simbar, M., Azin, S. A. & Zayeri, F. Public sexual health promotion interventions and strategies: A qualitative study. *Electronic physician* **8**, 2489–2496 (2016).
6. Arksey, H. & O'Malley, L. Scoping studies: towards a methodological framework. *International journal of social research methodology* **8**, 19–32 (2005).
7. Levac, D., Colquhoun, H. & O'Brien, K. K. Scoping studies: Advancing the methodology. *IMPLEMENT SCI* **5**, 69–69 (2010).
8. Peters, M. *et al.* Chapter 11: Scoping Reviews (2020 version). in (JBI Manual for Evidence Synthesis, 2020).
9. Thompson, K. *et al.* Sexual health promotion in primary care – activities and views of general practitioners and practice nurses. *Primary health care research & development* **9**, 319–330 (2008).
10. Khalil, H. & Kirschbaum, M. Adverse drug reactions in primary care: a scoping review protocol. *JBI database of systematic reviews and implementation reports* **16**, 615–621 (2018).
11. Treasury Board of Canada Secretariat. Integrating Gender-Based Analysis Plus into Evaluation: A Primer. (2019).

Running head: Sexual health promotion for SGM in primary care

12. National Institutes of Health. Sexual & Gender Minority Health Disparities Research Framework. (2021).
13. Promoting 2SLGBTQI+ Health Equity. (2021).
14. Frost, D. M., Lehavot, K. & Meyer, I. H. Minority stress and physical health among sexual minority individuals. *J BEHAV MED* **38**, 1–8 (2015).
15. Gabarron, E. & Wynn, R. Use of social media for sexual health promotion: a scoping review. *GLOBAL HEALTH ACTION* **9**, 32193–32193 (2016).
16. Global Health Sector Strategy on Sexually Transmitted Infections 2016-2021: Towards Ending STIs. (2016).
17. Edwards, W. M. & Coleman, E. Defining Sexual Health: A Descriptive Overview. *Arch Sex Behav* **33**, 189–195 (2004).
18. World Health Organization. Sexual health and its linkages to reproductive health: an operational approach. (2017).
19. Higgins, J. A. *et al.* Sexual minority women and contraceptive use: Complex pathways between sexual orientation and health outcomes. *AM J PUBLIC HEALTH* **109**, 1680–1686 (2019).
20. Scheim, A. I., Bauer, G. R. & Travers, R. HIV-Related Sexual Risk Among Transgender Men Who Are Gay, Bisexual, or Have Sex With Men. *Journal of acquired immune deficiency syndromes (1999)* **74**, e89–e96 (2017).
21. Ariella R. Tabaac, MS, Megan E. Sutter, PhD, Catherine S.J. Wall, BS, Kellan E. Baker, MA, MPH. Gender Identity Disparities in Cancer Screening Behaviors. *Am J Prev Med* 2018;54(3):385-393. *American journal of preventive medicine* **55**, 943–943 (2018).

Running head: Sexual health promotion for SGM in primary care

- 1  
2  
3  
4  
5  
6  
7  
8  
9  
10  
11  
12  
13  
14  
15  
16  
17  
18  
19  
20  
21  
22  
23  
24  
25  
26  
27  
28  
29  
30  
31  
32  
33  
34  
35  
36  
37  
38  
39  
40  
41  
42  
43  
44  
45  
46  
47  
48  
49  
50  
51  
52  
53  
54  
55  
56  
57  
58  
59  
60
22. Peitzmeier, S. M., MSPH, Khullar, K., BS, Reisner, S. L., ScD, MA & Potter, J., MD. Pap Test Use Is Lower Among Female-to-Male Patients Than Non-Transgender Women. *AM J PREV MED* **47**, 808–812 (2014).
23. Curry, S. J. *et al.* Screening for Cervical Cancer: US Preventive Services Task Force Recommendation Statement. *JAMA-J AM MED ASSOC* **320**, 674–686 (2018).
24. Bronfenbrenner, U. *The ecology of human development : experiments by nature and design.* (Harvard University Press, 1979).
25. Batchelder, A. W., Gonzalez, J. S., Palma, A., Schoenbaum, E. & Lounsbury, D. W. A Social Ecological Model of Syndemic Risk affecting Women with and At-Risk for HIV in Impoverished Urban Communities. *Am J Community Psychol* **56**, 229–240 (2015).
26. Aleshire, M. E., Ashford, K., Fallin-Bennett, A. & Hatcher, J. Primary Care Providers' Attitudes Related to LGBTQ People: A Narrative Literature Review. *Health Promotion Practice* **20**, 173–187 (2019).
27. Condran, B., Gahagan, J. & Isfeld-Kiely, H. A scoping review of social media as a platform for multi-level sexual health promotion interventions. *The Canadian journal of human sexuality* **26**, 26–37 (2017).
28. Champion, J. D., Young, C. & Rew, L. Substantiating the need for primary care-based sexual health promotion interventions for ethnic minority adolescent women experiencing health disparities. *J AM ASSOC NURSE PRA* **28**, 487–492 (2016).
29. Gott, M., Galena, E., Hinchliff, S. & Elford, H. “Opening a can of worms”: GP and practice nurse barriers to talking about sexual health in primary care. *FAM PRACT* **21**, 528–536 (2004).

Running head: Sexual health promotion for SGM in primary care

30. Khan, A., Plummer, D., Hussain, R. & Minichiello, V. Preventing sexually transmissible infections in Australian general practice. *INT J STD AIDS* **19**, 459–463 (2008).
31. Tricco, A. C. *et al.* PRISMA extension for scoping reviews (PRISMA-ScR): Checklist and explanation. *ANN INTERN MED* **169**, 467–473 (2018).
32. Lockwood, C., dos Santos, K. B. & Pap, R. Practical Guidance for Knowledge Synthesis: Scoping Review Methods. *Asian Nursing Research* **13**, 287–294 (2019).
33. Peters, M. D. J. *et al.* Updated methodological guidance for the conduct of scoping reviews. *JBI evidence synthesis* **18**, 2119–2126 (2020).
34. Hickson, M., Wanner, A. & Collinson, A. Dietitian-led clinics in primary care: A scoping review protocol. *JBI database of systematic reviews and implementation reports* **17**, 2525–2531 (2019).
35. United Nations. World Economic Situation and Prospects 2019. (2019).

**Appendix 1**

Table 1: Developed Countries According to the United Nations 2019 Report

| North America           | Europe (European Union)                                                                                                                                                                                                                                                                                                             | Other Europe                     | Asia and Pacific                  |
|-------------------------|-------------------------------------------------------------------------------------------------------------------------------------------------------------------------------------------------------------------------------------------------------------------------------------------------------------------------------------|----------------------------------|-----------------------------------|
| Canada<br>United States | Austria<br>Belgium<br>Denmark<br>Finland<br>France<br>Germany<br>Greece<br>Ireland<br>Italy<br>Luxembourg<br>Netherlands<br>Portugal<br>Spain<br>Sweden<br>United Kingdom<br><br>Bulgaria<br>Croatia<br>Cyprus<br>Czech Republic<br>Estonia<br>Hungary<br>Latvia<br>Lithuania<br>Malta<br>Poland<br>Romania<br>Slovakia<br>Slovenia | Iceland<br>Norway<br>Switzerland | Australia<br>Japan<br>New Zealand |

**Appendix 2****Medline search strategy****Ovid MEDLINE: Epub Ahead of Print, In-Process & Other Non-Indexed Citations, Ovid MEDLINE® Daily and Ovid MEDLINE® <1946-Present>**

1 exp "Sexual and Gender Minorities"/ 12718  
 2 bisexuality/ or exp homosexuality/ 33767  
 3 transsexualism/ 4269  
 4 Gender Identity/ 20626

5 Transvestism/ 643  
 6 Gender Dysphoria/ 787  
 7 (two spirit\* or twospirit\* or 2spirit\* or 2-spirit\* or gender non conforming or gender  
 8 nonconforming or LGBT\* or GLBT\* or GSM or MSM or WSW or lesbian\* or gay\* or  
 9 bisexual\* or homosexual\* or transgender\* or transsexual\* or trans gender\* or trans sexual\* or  
 10 trans spectrum or transspectrum or queer\* or intersex\* or asexual\* or pansexual\* or omnisexual\*  
 11 or genderqueer or genderfluid or gender fluid or third gender or fourth gender or double sex or  
 12 doublesex or twin spirit\* or twinspirit\* or sexual\* minorit\* or pangender\* or non binary or  
 13 nonbinary or bigender\* or agender\* or trigender\* or pan gender\* or bi gender\* or tri gender\* or  
 14 mixed gender\* or nonheterosexual\* or non heterosexual\* or gender dysphori\* or lesbigay\* or  
 15 bicurious or cross sex or crossgender or cross gender or gender change or gender identi\* or  
 16 gender reassign\* or gender transition\* or gender variant or men who have sex with men or same  
 17 gender loving or same sex attracted or same sex couple\* or same sex relations or sex change\* or  
 18 sex reassign\* or sex transition\* or gender minorit\* or sexual identit\* or sexual orientation or  
 19 trans man or transman or transmen or trans men or trans male\* or transmale\* or trans female\* or  
 20 transfemale\* or trans woman or transwoman or trans women or transwomen or transpeople or  
 21 transperson\* or trans people or trans person\* or FTM trans\* or female to male trans\* or MTF  
 22 trans\* or male to female trans\* or F2M or transvestite\* or women loving women or women who  
 23 have sex with women or females who have sex with females or males who have sex with  
 24 males).tw,kf. 79667  
 25  
 26 8 1 or 2 or 3 or 4 or 5 or 6 or 7 102717  
 27 9 Primary Health Care/ 88098  
 28 10 Comprehensive Health Care/ 6753  
 29 11 exp General Practice/ 77507  
 30 12 Community Health Centers/ 7444  
 31 13 Community Health Services/ 32807  
 32 14 Child Health Services/ 21242  
 33 15 Community Mental Health Services/ 18946  
 34 16 exp Maternal Health Services/ 55680  
 35 17 exp Community Mental Health Centers/ 3306  
 36 18 Maternal-Child Health Centers/ 2335  
 37 19 Physicians, Family/ 16968  
 38 20 General Practitioners/ 9723  
 39 21 Physicians, Primary Care/ 4185  
 40 22 Ambulatory Care Facilities/ 21260  
 41 23 Outpatient Clinics, Hospital/ 15838  
 42 24 Outpatients/ 19655  
 43 25 Preventive Medicine/ 12012  
 44 26 primary care.tw,kf. 134345  
 45 27 primary healthcare.tw,kf. 8273  
 46 28 primary health care.tw,kf. 31426  
 47 29 Family practice\*.tw,kf. 8926  
 48 30 family medicine.tw,kf. 12686  
 49 31 general practitioner\*.tw,kf. 54979  
 50 32 family physician\*.tw,kf. 15836  
 51 33 family doctor\*.tw,kf. 5019



1  
2  
3 34 Community Health Centre\*.tw,kf. 1099  
4 35 Community Health Center\*.tw,kf. 3609  
5 36 Community Healthcare.tw,kf. 1145  
6 37 Community Health Care.tw,kf. 1320  
7 38 Community Health service\*.tw,kf. 2040  
8 39 ((outpatient\* or ambulatory or community) adj4 (clinic or clinics or healthcare or health  
9 care or centre\* or centers)).tw,kf. 79763  
10 40 (Family Health Group\* or Family Health Network\* or Family Health Organization\* or  
11 Family Health Team\* or integrated delivery network\* or Integrated Health Network\* or  
12 integrated physician network\* or Integrated Service Delivery Model\* or Physician Integrated  
13 Network\* or family Health Center\* or Family Health Centre\* or Family Medicine Unit\*).tw,kf.  
14 1298  
15 41 (medical home or medical homes).tw,kf. 3671  
16 42 exp Pharmacists/ 20219  
17 43 Pharmacies/ 9149  
18 44 (pharmacist\* or pharmacy or pharmacies).tw,kf. 80590  
19 45 or/9-44614862  
20 46 8 and 45 3614  
21 47 Sexual Health/2035  
22 48 exp Sexual Behavior/ 117936  
23 49 exp Sexually Transmitted Diseases/ 367290  
24 50 sexual partners/ 19519  
25 51 Pregnancy, Unplanned/ 2327  
26 52 exp Abortion, Induced/ 41794  
27 53 Reproductive Health/ 4569  
28 54 exp infertility/ or reproductive tract infections/ or exp sexual dysfunction, physiological/  
29 103470  
30 55 exp Papillomavirus Vaccines/9492  
31 56 sex counseling/ or sex education/ 9962  
32 57 Papanicolaou Test/ 7071  
33 58 exp Contraception/ 28691  
34 59 exp Contraceptive Devices/ 26611  
35 60 exp Reproductive Behavior/ 10003  
36 61 exp Intimate Partner Violence/ 12071  
37 62 exp Sexual Dysfunctions, Psychological/ 29078  
38 63 family planning services/ 25924  
39 64 exp Fertility/ 44610  
40 65 exp climacteric/ or exp reproduction/ 1267049  
41 66 Libido/4959  
42 67 Reproductive Rights/ 1079  
43 68 Rape/ 6707  
44 69 Sex Offenses/ 10671  
45 70 Sex Workers/ 2770  
46 71 exp Sex Reassignment Procedures/ 1216  
47 72 Health Services for Transgender Persons/ 187  
48 73 exp Hormone Replacement Therapy/ 26077  
49  
50  
51  
52  
53  
54  
55  
56  
57  
58  
59  
60

74 (sexual\* health\* or sexuality or sex\* education or sex\* counsel\* or sex\* therap\* or sexual relations\* or sex\* partner\* or sexual dysfunction\* or sexual violence or sexual wellbeing or sexual well being or sexual behavior\* or sexual behaviour\* or sexual risk\* or risk\* sex\* or sexual satisfaction or sexual pleasure or sexual\* assault\* or sexual problem\* or sex work\* or sex\* offen\* or rape or raped or sex reassign\* or sexual communication or reproductive health\* or reproductive behavior\* or reproductive behaviour\* or hormone replacement or hormone therapy or affirmative care or gender affirming care or Intercourse or contraception or contraceptive or condom or condoms or safe\* sex\* or unsafe sex\* or unplanned pregnanc\* or unintended pregnanc\* or unwanted pregnanc\* or abortion\* or birth control or fertility or infertil\* or family planning or intimate partner violence or menopause or andropause or sexually transmitted infection\* or sexually transmitted disease\* or STI or STIs or STD or STDs or HIV or AIDS or Human immunodeficiency virus or Acquired immune deficiency syndrome or Pre-Exposure Prophylaxis or Preexposure Prophylaxis Hepatitis A or Hepatitis B or Hepatitis C or chlamydia or Gonorrhoea or gonorrhoea or pelvic inflammatory disease or Trichomoniasis or papillomavirus infection\* or papillomavirus vaccin\* or HPV vaccin\* or syphilis or herpes genitalis or Chancroid or granuloma inguinale or condylomata accuminata or Bacterial Vaginosis or Cervical cancer or cervical neoplasm\* or cervical intra-epithelial neoplasia or uterine cervical dysplasia or dyspareunia or erectile dysfunction).tw,kf. 1135473

75 or/47-74 2352976

76 46 and 75 2909

77 exp canada/ or exp united states/ or europe/ or austria/ or belgium/ or europe, eastern/ or Bulgaria/ or exp baltic states/ or croatia/ or czech republic/ or hungary/ or poland/ or romania/ or slovakia/ or slovenia/ or exp france/ or exp germany/ or exp united kingdom/ or greece/ or ireland/ or exp italy/ or luxembourg/ or mediterranean region/ or mediterranean islands/ or cyprus/ or malta/ or netherlands/ or portugal/ or exp "scandinavian and nordic countries"/ or spain/ or switzerland/ or exp australia/ or iceland/ or new zealand/ or exp japan/ 3252008

78 (Australia\* or Austria\* or Belgium or Belgian\* or Canada\* or Canadian\* or Czech\* or Denmark or Danish or Estonia\* or Finland or Finnish or France or French or German\* or Greece or Greek or Hungar\* or Iceland\* or Italy or Italian\* or Japan\* or Latvia\* or Lithuania\* or Luxembourg or Malta or Maltese or Netherlands or Holland or Dutch or New Zealand\* or Norway or Norwegian\* or Poland or Polish or Portugal or Portuguese or Slovak\* or Slovenia\* or Spain or Spanish or Sweden or Swedish or Switzerland or Swiss or United Kingdom or UK or England or British or Ireland or Irish or Scotland or Scottish or Wales or Welsh or United States or America\* or USA or Bulgaria\* or Croatia\* or Cyprus or Romania\*).tw,kf. 2515782

79 african americans/ or american native continental ancestry group/ or alaska natives/ or indians, north american/ or inuits/ or oceanic ancestry group/ or asian americans/ or exp indigenous peoples/ or exp hispanic americans/ 119364

80 (canad\* or "british columbia" or "Colombie britannique" or alberta\* or saskatchewan or manitoba\* or ontario or quebec or "nouveau brunswick" or "nova scotia" or "nouvelle ecosse" or "prince edward island" or newfoundland or labrador or nunavut or nwt or "northwest territories" or yukon or nunavik or inuvialuit).tw,kf. 189983

81 77 or 78 or 79 or 80 4544737

82 76 and 81 1778

83 exp Africa/ or exp caribbean region/ or exp central america/ or latin america/ or exp south america/ or exp asia, central/ or exp asia, northern/ or exp asia, southeastern/ or exp asia,

1  
2  
3  
4  
5  
6  
7  
8  
9  
10  
11  
12  
13  
14  
15  
16  
17  
18  
19  
20  
21  
22  
23  
24  
25  
26  
27  
28  
29  
30  
31  
32  
33  
34  
35  
36  
37  
38  
39  
40  
41  
42  
43  
44  
45  
46  
47  
48  
49  
50  
51  
52  
53  
54  
55  
56  
57  
58  
59  
60

```

western/ or exp china/ or exp korea/ or exp mongolia/ or exp taiwan/ or exp USSR/
1396125
84 76 not 83 2536
85 82 or 84 2593
86 limit 85 to (english language and yr="2000 -Current") 1956

```

For peer review only

## Preferred Reporting Items for Systematic reviews and Meta-Analyses extension for Scoping Reviews (PRISMA-ScR) Checklist

| SECTION                                               | ITEM | PRISMA-ScR CHECKLIST ITEM                                                                                                                                                                                                                                                                                  | REPORTED ON PAGE #        |
|-------------------------------------------------------|------|------------------------------------------------------------------------------------------------------------------------------------------------------------------------------------------------------------------------------------------------------------------------------------------------------------|---------------------------|
| <b>TITLE</b>                                          |      |                                                                                                                                                                                                                                                                                                            |                           |
| Title                                                 | 1    | Identify the report as a scoping review.                                                                                                                                                                                                                                                                   | Click here to enter text. |
| <b>ABSTRACT</b>                                       |      |                                                                                                                                                                                                                                                                                                            |                           |
| Structured summary                                    | 2    | Provide a structured summary that includes (as applicable): background, objectives, eligibility criteria, sources of evidence, charting methods, results, and conclusions that relate to the review questions and objectives.                                                                              | Click here to enter text. |
| <b>INTRODUCTION</b>                                   |      |                                                                                                                                                                                                                                                                                                            |                           |
| Rationale                                             | 3    | Describe the rationale for the review in the context of what is already known. Explain why the review questions/objectives lend themselves to a scoping review approach.                                                                                                                                   | Click here to enter text. |
| Objectives                                            | 4    | Provide an explicit statement of the questions and objectives being addressed with reference to their key elements (e.g., population or participants, concepts, and context) or other relevant key elements used to conceptualize the review questions and/or objectives.                                  | Click here to enter text. |
| <b>METHODS</b>                                        |      |                                                                                                                                                                                                                                                                                                            |                           |
| Protocol and registration                             | 5    | Indicate whether a review protocol exists; state if and where it can be accessed (e.g., a Web address); and if available, provide registration information, including the registration number.                                                                                                             | Click here to enter text. |
| Eligibility criteria                                  | 6    | Specify characteristics of the sources of evidence used as eligibility criteria (e.g., years considered, language, and publication status), and provide a rationale.                                                                                                                                       | Click here to enter text. |
| Information sources*                                  | 7    | Describe all information sources in the search (e.g., databases with dates of coverage and contact with authors to identify additional sources), as well as the date the most recent search was executed.                                                                                                  | Click here to enter text. |
| Search                                                | 8    | Present the full electronic search strategy for at least 1 database, including any limits used, such that it could be repeated.                                                                                                                                                                            | Click here to enter text. |
| Selection of sources of evidence†                     | 9    | State the process for selecting sources of evidence (i.e., screening and eligibility) included in the scoping review.                                                                                                                                                                                      | Click here to enter text. |
| Data charting process‡                                | 10   | Describe the methods of charting data from the included sources of evidence (e.g., calibrated forms or forms that have been tested by the team before their use, and whether data charting was done independently or in duplicate) and any processes for obtaining and confirming data from investigators. | Click here to enter text. |
| Data items                                            | 11   | List and define all variables for which data were sought and any assumptions and simplifications made.                                                                                                                                                                                                     | Click here to enter text. |
| Critical appraisal of individual sources of evidence§ | 12   | If done, provide a rationale for conducting a critical appraisal of included sources of evidence; describe the methods used and how this information was used in any data synthesis (if appropriate).                                                                                                      | Click here to enter text. |

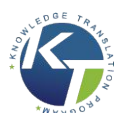

| SECTION                                       | ITEM | PRISMA-ScR CHECKLIST ITEM                                                                                                                                                                       | REPORTED ON PAGE #        |
|-----------------------------------------------|------|-------------------------------------------------------------------------------------------------------------------------------------------------------------------------------------------------|---------------------------|
| Synthesis of results                          | 13   | Describe the methods of handling and summarizing the data that were charted.                                                                                                                    | Click here to enter text. |
| <b>RESULTS</b>                                |      |                                                                                                                                                                                                 |                           |
| Selection of sources of evidence              | 14   | Give numbers of sources of evidence screened, assessed for eligibility, and included in the review, with reasons for exclusions at each stage, ideally using a flow diagram.                    | Click here to enter text. |
| Characteristics of sources of evidence        | 15   | For each source of evidence, present characteristics for which data were charted and provide the citations.                                                                                     | Click here to enter text. |
| Critical appraisal within sources of evidence | 16   | If done, present data on critical appraisal of included sources of evidence (see item 12).                                                                                                      | Click here to enter text. |
| Results of individual sources of evidence     | 17   | For each included source of evidence, present the relevant data that were charted that relate to the review questions and objectives.                                                           | Click here to enter text. |
| Synthesis of results                          | 18   | Summarize and/or present the charting results as they relate to the review questions and objectives.                                                                                            | Click here to enter text. |
| <b>DISCUSSION</b>                             |      |                                                                                                                                                                                                 |                           |
| Summary of evidence                           | 19   | Summarize the main results (including an overview of concepts, themes, and types of evidence available), link to the review questions and objectives, and consider the relevance to key groups. | Click here to enter text. |
| Limitations                                   | 20   | Discuss the limitations of the scoping review process.                                                                                                                                          | Click here to enter text. |
| Conclusions                                   | 21   | Provide a general interpretation of the results with respect to the review questions and objectives, as well as potential implications and/or next steps.                                       | Click here to enter text. |
| <b>FUNDING</b>                                |      |                                                                                                                                                                                                 |                           |
| Funding                                       | 22   | Describe sources of funding for the included sources of evidence, as well as sources of funding for the scoping review. Describe the role of the funders of the scoping review.                 | Click here to enter text. |

JBI = Joanna Briggs Institute; PRISMA-ScR = Preferred Reporting Items for Systematic reviews and Meta-Analyses extension for Scoping Reviews.

\* Where *sources of evidence* (see second footnote) are compiled from, such as bibliographic databases, social media platforms, and Web sites.

† A more inclusive/heterogeneous term used to account for the different types of evidence or data sources (e.g., quantitative and/or qualitative research, expert opinion, and policy documents) that may be eligible in a scoping review as opposed to only studies. This is not to be confused with *information sources* (see first footnote).

‡ The frameworks by Arksey and O'Malley (6) and Levac and colleagues (7) and the JBI guidance (4, 5) refer to the process of data extraction in a scoping review as data charting.

§ The process of systematically examining research evidence to assess its validity, results, and relevance before using it to inform a decision. This term is used for items 12 and 19 instead of "risk of bias" (which is more applicable to systematic reviews of interventions) to include and acknowledge the various sources of evidence that may be used in a scoping review (e.g., quantitative and/or qualitative research, expert opinion, and policy document).

From: Tricco AC, Lillie E, Zarin W, O'Brien KK, Colquhoun H, Levac D, et al. PRISMA Extension for Scoping Reviews (PRISMA-ScR): Checklist and Explanation. *Ann Intern Med.* 2018;169:467–473. doi: 10.7326/M18-0850.

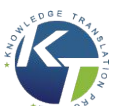

# BMJ Open

## Sexual Health Promotion for Sexual and Gender Minorities in Primary Care: A Scoping Review Protocol

|                                 |                                                                                                                                                                                                                                                                                                                                                                                                                                                                                                                                                                                                                                                                                                                                                                                                                                                                                                                                                                                                                                                                                                                                                                                                                                                                                                                                                                                                                                                                               |
|---------------------------------|-------------------------------------------------------------------------------------------------------------------------------------------------------------------------------------------------------------------------------------------------------------------------------------------------------------------------------------------------------------------------------------------------------------------------------------------------------------------------------------------------------------------------------------------------------------------------------------------------------------------------------------------------------------------------------------------------------------------------------------------------------------------------------------------------------------------------------------------------------------------------------------------------------------------------------------------------------------------------------------------------------------------------------------------------------------------------------------------------------------------------------------------------------------------------------------------------------------------------------------------------------------------------------------------------------------------------------------------------------------------------------------------------------------------------------------------------------------------------------|
| Journal:                        | <i>BMJ Open</i>                                                                                                                                                                                                                                                                                                                                                                                                                                                                                                                                                                                                                                                                                                                                                                                                                                                                                                                                                                                                                                                                                                                                                                                                                                                                                                                                                                                                                                                               |
| Manuscript ID                   | bmjopen-2022-066704.R1                                                                                                                                                                                                                                                                                                                                                                                                                                                                                                                                                                                                                                                                                                                                                                                                                                                                                                                                                                                                                                                                                                                                                                                                                                                                                                                                                                                                                                                        |
| Article Type:                   | Protocol                                                                                                                                                                                                                                                                                                                                                                                                                                                                                                                                                                                                                                                                                                                                                                                                                                                                                                                                                                                                                                                                                                                                                                                                                                                                                                                                                                                                                                                                      |
| Date Submitted by the Author:   | 09-Jan-2023                                                                                                                                                                                                                                                                                                                                                                                                                                                                                                                                                                                                                                                                                                                                                                                                                                                                                                                                                                                                                                                                                                                                                                                                                                                                                                                                                                                                                                                                   |
| Complete List of Authors:       | <p>Homme, Paige; Li Ka Shing Knowledge Institute, St. Michael's Hospital, Unity Health Toronto, MAP Centre for Urban Health Solutions; University of Toronto, Temerty Faculty of Medicine</p> <p>Truong, Robinson; Li Ka Shing Knowledge Institute, St. Michael's Hospital, Unity Health Toronto, MAP Centre for Urban Health Solutions; University of Toronto, Temerty Faculty of Medicine</p> <p>Gong, Jenny; University of Toronto Dalla Lana School of Public Health; University of Oxford Nuffield Department of Population Health</p> <p>Ziegler, Carolyn; Unity Health Toronto, Library Services</p> <p>Freitas, Cassandra; Li Ka Shing Knowledge Institute, St. Michael's Hospital, Unity Health Toronto, MAP Centre for Urban Health Solutions; University of Toronto Dalla Lana School of Public Health</p> <p>Yeung, Anna; Li Ka Shing Knowledge Institute, St. Michael's Hospital, Unity Health Toronto, MAP Centre for Urban Health Solutions</p> <p>Tan, Darrell; Li Ka Shing Knowledge Institute, St. Michael's Hospital, Unity Health Toronto, MAP Centre for Urban Health Solutions; Unity Health Toronto, Division of Infectious Diseases, St. Michael's Hospital</p> <p>Burchell, Ann; Li Ka Shing Knowledge Institute, St. Michael's Hospital, Unity Health Toronto, Department of Family and Community Medicine and Centre for Research on Inner City Health; University of Toronto Faculty of Medicine, Department of Family and Community Medicine</p> |
| <b>Primary Subject Heading</b>: | Sexual health                                                                                                                                                                                                                                                                                                                                                                                                                                                                                                                                                                                                                                                                                                                                                                                                                                                                                                                                                                                                                                                                                                                                                                                                                                                                                                                                                                                                                                                                 |
| Secondary Subject Heading:      | General practice / Family practice                                                                                                                                                                                                                                                                                                                                                                                                                                                                                                                                                                                                                                                                                                                                                                                                                                                                                                                                                                                                                                                                                                                                                                                                                                                                                                                                                                                                                                            |
| Keywords:                       | SEXUAL MEDICINE, HIV & AIDS < INFECTIOUS DISEASES, PRIMARY CARE                                                                                                                                                                                                                                                                                                                                                                                                                                                                                                                                                                                                                                                                                                                                                                                                                                                                                                                                                                                                                                                                                                                                                                                                                                                                                                                                                                                                               |
|                                 |                                                                                                                                                                                                                                                                                                                                                                                                                                                                                                                                                                                                                                                                                                                                                                                                                                                                                                                                                                                                                                                                                                                                                                                                                                                                                                                                                                                                                                                                               |

SCHOLARONE™  
Manuscripts

Running head: Sexual health promotion for SGM in primary care

1  
2  
3 1 **Sexual Health Promotion for Sexual and Gender Minorities in Primary Care: A Scoping**  
4  
5 2  
6 **Review Protocol**  
7

8  
9 3 Paige HOMME\*<sup>1,2</sup>, Robinson TRUONG\*<sup>1,2</sup>, Jenny GONG<sup>1,3,8</sup>, Carolyn ZIEGLER<sup>7</sup>, Cassandra  
10  
11 4 FREITAS<sup>1,3</sup>, Anna YEUNG<sup>1</sup>, Darrell H.S. TAN<sup>1,2,4,5</sup> & Ann N. BURCHELL<sup>1,2,3,6</sup>  
12

13 5 \*Equal contributing authors  
14  
15

- 16 6 1. MAP Centre for Urban Health Solutions, St. Michael's Hospital, Unity Health Toronto  
17  
18 7 2. Temerty Faculty of Medicine, University of Toronto  
19  
20 8 3. Dalla Lana School of Public Health, University of Toronto  
21  
22 9 4. Division of Infectious Diseases, St. Michael's Hospital, Unity Health Toronto  
23  
24 10 5. Department of Medicine, St. Michael's Hospital, Unity Health Toronto  
25  
26 11 6. Department of Family and Community Medicine, St. Michael's Hospital, Unity Health  
27  
28 Toronto  
29  
30 12 7. Library Services, Unity Health Toronto  
31  
32 13 8. Nuffield Department of Population Health, University of Oxford  
33  
34  
35 14  
36 15

37  
38 16 **Corresponding author**

39 17 Ann N. Burchell  
40 18 MAP Centre for Urban Health Solutions and Department of Family and Community Medicine,  
41 19 St. Michael's Hospital, Unity Health Toronto; Temerty Faculty of Medicine and Dalla Lana  
42 20 School of Public Health, University of Toronto  
43 21 [ann.burchell@unityhealth.to](mailto:ann.burchell@unityhealth.to)  
44 22

45 23 **SHORT TITLE**

46 24 SGM health promotion in primary care  
47  
48  
49 25  
50

51 26 Word Count: 2725/4000  
52

53 27 **KEYWORDS**

54  
55  
56 28 Sexual medicine, HIV & AIDS < infectious diseases, primary care  
57  
58

Running head: Sexual health promotion for SGM in primary care

## 28 **ABSTRACT**

29 **Introduction:** Sexual and gender minorities (SGM) face health disparities related to systemic  
30 discrimination and barriers to sexual health. Sexual health promotion encompasses strategies that  
31 enable individuals, groups, and communities to make informed decisions regarding their sexual  
32 well-being. Our objective is to describe the existing sexual health promotion interventions  
33 tailored for SGMs within the primary care context.

34  
35 **Methods and analysis:** We will conduct a scoping review and search for articles in eleven  
36 medical and social science academic databases on interventions that are targeted towards SGM  
37 in the primary care context in industrialized countries. Searches were conducted on July 7, 2020  
38 and May 31, 2022. We defined sexual health interventions in the inclusion framework as 1)  
39 promote positive sexual health, or sex and relationship education; 2) reduce the incidence of  
40 STIs; 3) reduce unintended pregnancies; or 4) change prejudice, stigma, and discrimination  
41 around sexual health, or increase awareness surrounding positive sex. Two independent  
42 reviewers will select articles meeting inclusion criteria and extract data. Participant and study  
43 characteristics will be summarized using frequencies and proportions. Our primary analysis will  
44 include a descriptive summary of key interventional themes from content and thematic analysis.  
45 Gender-based Analysis Plus (GBA+) will be used to stratify themes based on gender, race,  
46 sexuality, and other identities. The secondary analysis will include the use of the Sexual and  
47 Gender Minority Disparities Research Framework to analyze the interventions from a social-  
48 ecological perspective.

49  
50 **Ethics and dissemination:** No ethical approval is required for a scoping review. The protocol  
51 was registered on the Open Science Framework Registries  
52 (<https://doi.org/10.17605/OSF.IO/X5R47>). The intended audiences are primary care providers,  
53 public health, researchers, and community-based organizations. Results will be communicated  
54 through peer review publication, conferences, rounds, and other opportunities to reach primary  
55 care providers. Community-based engagement will occur through presentations, guest speakers,  
56 community forums and research summary handouts.

## 57 **Strengths and limitations of this study**

- 58  
59 • The research question was kept broad to capture the diversity of sexual health promotion  
60 in primary care.
- 61 • Focuses on interventions that can inspire and be utilized by primary care providers for  
62 sexual and gender minority patients.
- 63 • Includes both peer-reviewed and grey literature, with the intention of keeping the scope  
64 broad.
- 65 • Narrow definition of sexual health promotion interventions and definition of primary  
66 care.
- 67 • Focuses on only developed countries according to the United Nations Report 2019,  
68 leading to exclusion of studies and may reduce generalizability to other care contexts.



Running head: Sexual health promotion for SGM in primary care

## 70 **INTRODUCTION**

71 The term “sexual and gender minorities” encompasses identities such as Two-Spirit, lesbian,  
72 gay, bisexual, transgender, queer, questioning, intersex and asexual (2SLGBTQIA+)  
73 individuals that represent a diverse group of people and communities with intersecting identities  
74 such as race, socioeconomic status and others<sup>1</sup>. These intersecting identities and backgrounds  
75 define unique identity locations that influence experiences of stigma and discrimination in the  
76 healthcare system<sup>2</sup>. Sexual and gender minority individuals face health disparities<sup>3</sup>, including  
77 access to health care, discrimination by health providers, postponing or not attempting to seek  
78 care, and access to health insurance<sup>1,4</sup>. Furthermore, minority stress theory suggests that sexual  
79 minority individuals face more exposure to social stress related to stigma, prejudice and  
80 discrimination and therefore are at greater risk for negative physical and mental health outcomes,  
81 compared to their heterosexual counterparts<sup>5</sup>.

82  
83 Sexual health remains a significant public health challenge around the world and continues to  
84 impact Western industrialized countries<sup>6</sup>. Approximately one million people around the world  
85 acquire a STI every day, and the resulting morbidity and mortality compromises individual  
86 quality of life as well as overall sexual and reproductive health<sup>7,8</sup>. Though many definitions of  
87 sexual health have been proposed<sup>9</sup>, the most cited and widely accepted is the World Health  
88 Organization definition: “a state of physical, emotional, mental, and social well-being in relation  
89 to sexuality; it is not merely the absence of disease, dysfunction, or infirmity.”<sup>10</sup> Sexual and  
90 gender minorities face varying sexual health issues. For example, sexual minority women are  
91 more likely to report sexually transmitted infections (STIs) and unintended pregnancies  
92 compared to their heterosexual counterparts<sup>11</sup>. Cis- and transgender gay, bisexual, and other men  
93 who have sex with men (GBMSM) are at particularly high risk for acquiring HIV<sup>12</sup>.  
94 Transmasculine individuals have a significantly reduced odds of undergoing cervical cancer  
95 screening as compared to cis-women<sup>13,14</sup>. To reduce the global burden of STIs, WHO’s *Global*  
96 *Health Sector Strategy on Sexually Transmitted Infections* Report points to the need to adopt  
97 appropriate interventions aimed to promote sexual health<sup>8</sup>.

98  
99 Sexual health promotion encompasses strategies that enable individuals, groups, and  
100 communities to make informed decisions regarding their sexual well-being<sup>10</sup>. These strategies  
101 often focus on intervening at the individual level, through the provision of educational, peer-  
102 based, motivational, or skills-based programs<sup>15</sup>. From social-ecological perspective, sexual  
103 health and sexual behaviour change takes place within five nested, interacting environmental  
104 levels with the individual at the centre<sup>16–18</sup>. The individual and the surrounding microsystem  
105 represent the most immediate environment and factors that drive health disparities and unmet  
106 care needs<sup>18</sup>. The mesosystem is the relationship between the health provider and patient and the  
107 ecosystem encompasses health system policies, decisions made among health providers and  
108 insurance<sup>18</sup>. The macrosystem is the broader cultural environment that influences stigma and  
109 discrimination and the chronosystem describes how location in time and place impacts the  
110 individual<sup>18</sup>. It is important to examine sexual health promotion interventions that move beyond  
111 the individual level to address multiple domains as they have the potential to further improve  
112 sustainable behaviour change and positive sexual health outcomes<sup>19</sup>.

113  
114 Primary care is uniquely situated to address many environments to positively influence sexual  
115 health of sexual and gender minority individuals; ranging from patient-level interaction,

Running head: Sexual health promotion for SGM in primary care

1  
2  
3 116 community-based interventions to targeted policy changes. Researchers advocate that primary  
4 117 health care environments are important settings for delivering routine sexual health promotion  
5 118 services<sup>20</sup>. Yet, though sexual health is recognized as an important topic within primary care, it  
6 119 is often overlooked in practice<sup>21</sup>. Specifically, Khan *et al.* (2008)<sup>22</sup> reported that many primary  
7 120 care providers do not discuss sexual health with their patients due to challenges integrating  
8 121 sexual health into their practice, citing heavy workloads, lack of time, and inadequate training as  
9 122 barriers<sup>23</sup>. In the context of sexual and gender minority patients, lack of knowledge and  
10 123 understanding is cited as a barrier to ask about a patient's gender, sexuality and sexual health<sup>18</sup>.

11 124  
12 125 The objective of this scoping review is to synthesize what evidence currently exists regarding  
13 126 sexual health promotion interventions for sexual and gender minorities in the primary care  
14 127 context, to examine the landscape of the literature and to map out existing and promising areas of  
15 128 priority, improvement, and future research.  
16 129

## 17 128 18 129 19 130 **METHODS AND ANALYSIS**

20  
21 131 Our scoping review approach is informed by frameworks proposed by Arksey and O'Malley  
22 132 (2002)<sup>24</sup>, Levac *et al.* (2010)<sup>25</sup>, and the Joanna Briggs Institute<sup>26</sup>. These researchers outlined six  
23 133 stages involved in conducting a rigorous scoping review: 1) identifying the research question; 2)  
24 134 identifying relevant studies; 3) selecting relevant studies; 4) charting data; 5) summarizing and  
25 135 reporting findings and 6) an optional consultation exercise. In addition, we utilize the Preferred  
26 136 Reporting Items for Systematic reviews and Meta-Analyses extension for Scoping Reviews  
27 137 (PRISMA-ScR) Checklist in developing this protocol as it the most used and widely accepted  
28 138 standard of reporting scoping reviews<sup>27-29</sup>. The scoping review protocol was registered on the  
29 139 Open Science Framework Registries (DOI: 10.17605/OSF.IO/X5R47)  
30 140

### 31 140 32 141 **Patient and public involvement**

33 141 No patients were involved in this scoping review.  
34 142  
35 143

### 36 144 **Eligibility Criteria**

#### 37 145 *Participants*

38 145 Our focus will be on studies involving interventions targeted towards youth and adult sexual and  
39 146 gender minorities, including but not limited to those who identify as Two-Spirit, lesbian, gay,  
40 147 bisexual, transgender, transsexual, queer, questioning, intersex, and asexual. We will include  
41 148 studies that targeted sexual and gender minorities populations who may also benefit from the  
42 149 intervention. Conversely, we will exclude studies that included sexual and gender minority  
43 150 individuals along with other groups of interest or the general population without clear targeting  
44 151 or intention to focus on sexual and gender minorities. We will exclude interventions targeting  
45 152 children under the age of 12.  
46 153  
47 154

#### 48 154 49 155 *Concept*

50 156 This review will be inclusive of studies that examine a wide range of sexual health promotion  
51 157 interventions based in the primary care contexts. For this review, we will adapt the definition of  
52 158 sexual health promotion employed by Thompson *et al.* (2008)<sup>23</sup>, wherein the term encompasses,  
53 159 but is not limited to, any activity that: 1) promotes positive sexual health, or sex and relationship  
54 160 education; 2) reduces the incidence of STIs (including HIV); 3) reduces unintended pregnancies;  
55 161 4) changes prejudice, stigma and discrimination, or  
56 161  
57  
58

Running head: Sexual health promotion for SGM in primary care

1  
2  
3 162 increase positive attitudes surrounding positive sex, often referred to as “sex positivity”, will be  
4 163 defined as “an ideology that promotes, with respect to gender and sexuality, being open-minded,  
5 164 non-judgmental and respectful of personal sexual autonomy, when there is consent.”<sup>30</sup> This may  
6 165 be applied to improving wellbeing and relationships to embracing one’s own sexuality.  
7 166

### 167 *Context*

168 Our context is the primary care setting, which includes “first-contact services” such as general  
169 practitioners or family medicine clinics, pharmacies, tele-health, outpatient clinics, community or  
170 venue-based clinics, sexual health clinics, and other clinical settings that does not consider  
171 patients as “inpatients”<sup>31</sup>. We will include research based in both “general practice” and “family  
172 medicine” since these terms are synonymous with primary care and may be used interchangeably  
173 in literature<sup>32</sup>. We will restrict our focus to studies conducted in “economically developed”  
174 nations, as defined by the 2019 United Nations World Economic Situation Prospects report  
175 classifications (Appendix 1, Table 1)<sup>33</sup>.  
176

### 177 *Types of studies*

178 Studies using any study design will be eligible, including but not limited to systematic reviews,  
179 randomized controlled trials, quasi-experimental trials, cohort studies, case control studies, and  
180 cross-sectional studies. Mixed methods research and qualitative study designs such as  
181 phenomenological and ethnographic studies will also be included. For feasibility reasons, only  
182 articles published in English were included. We will restrict the review to articles published  
183 between the year 2000 to 2022, to maximize relevance to the current healthcare context. We will  
184 include conference articles, editorials and commentaries to better capture the scope of health  
185 promoting intervention.  
186

### 187 **Search strategy and Information Sources**

188 The search strategies will be developed iteratively by the team and carried out by an experienced  
189 medical librarian (CZ), utilizing a comprehensive range of medical subject headings and  
190 keyword each terms corresponding to our population (sexual and gender minorities), concept  
191 (sexual health promotion), and context (primary care in high income countries). The search  
192 strategies will be adapted for each database and will be limited English language articles  
193 published from 2000 to the present. In total, eleven databases will be searched for this review:  
194 Medline (Ovid), Embase (Ovid), PsycINFO (Ovid), CINAHL (EBSCOhost), the Cochrane  
195 Database of Systematic Reviews (Ovid), Cochrane Central Register of Controlled Trials (Ovid),  
196 Web of Science (Science Citation Index, Social Sciences Citation Index, Conference  
197 Proceedings Citation Index Science, Conference Proceedings Citation Index- Social Science &  
198 Humanities), Gender Studies Database & LGBTQ+ Source (EBSCOhost). The complete Ovid  
199 Medline search strategy is available in Appendix 2. All search strategies, exactly as run, will be  
200 made available upon publication of the final review. Additional search strategy that will be  
201 employed is cited reference searching of the systematic reviews that meet inclusion criteria.  
202

### 203 **Study selection**

204 Search results from each database will be compiled in EndNote and duplicates removed, then  
205 subsequently imported into the Covidence® software where any additional duplicate citations  
206 will be removed. Two reviewers will independently review titles and abstracts of each citation  
207 against the inclusion criteria. Conflicts will be resolved through discussion until consensus is  
208

Running head: Sexual health promotion for SGM in primary care

reached or bringing in a third reviewer if necessary. Articles meeting the inclusion criteria will then move on to full text review by two independent reviewers. We will record reasons for excluding articles. Disagreements between the reviewers at the full text review process will be resolved through consensus where possible, or by the decision of a third reviewer if not. Articles that meet inclusion/exclusion criteria upon full text review will be imported into Covidence®. The results of the search and study selection process will be reported using a PRISMA flow diagram.

### Data Extraction Process

One reviewer will independently extract data, including article type, description of intervention, themes and subthemes, and participant descriptors, from the final eligible articles. We will pilot a draft extraction table on the first five eligible articles; table modifications will be made iteratively. A second reviewer will validate the accuracy of data extraction from the entire set of articles extracted by the first reviewer. Discrepancies will be discussed between the two reviewers until consensus is reached or by arbitration of a third reviewer, if necessary. Reviewers will attempt to contact study authors by email up to three attempts per article, to request missing or additional information if required.

### Data Analysis and Presentation

We will describe key characteristics of the included studies, including participants' gender, sexuality, race/ethnicity, age range, country of study. Results will be summarized as Tables and/or figures in the final scoping review article. After data extraction, we will conduct thematic analysis to identify major content area categories, themes, and subthemes of the interventions. These results will be quantified and presented in graph and tabular formats in the final review. Themes and sub-themes identified will be described in greater detail in narrative summaries.

We will use the Sexual and Gender Minority Disparities Research Framework from the NIH<sup>34</sup> to analyze the interventions from a social-ecological perspective in terms of individual, community, and policy, for example. For our analyses, this framework has been adapted from The National Institute on Minority Health and Health Disparities (NIMHD) framework<sup>35</sup> and is intended to be used for primary research and as a tool to analyze existing research<sup>36</sup>. It has been adapted to analyze different axes of health disparities including mental health<sup>36</sup>, and vaccine hesitancy<sup>37</sup>. A recent study by Chuang and colleagues<sup>38</sup>, used the NIMHD framework to evaluate the literature on disparities in End-of-Life outcomes for Black patients and families. To the best of our knowledge, our scoping review represents its first application of the NIMHD framework for sexual health interventions in primary care among SGM communities.

We will be using the GBA+ framework<sup>39</sup> as an intentional approach to investigate differences in primary care according to sex, gender, sexual orientation, race and ethnicity. For articles containing quantitative analyses, we will consider whether analyses were stratified by sex, gender, or sexual orientation and if so, recording the results for each group and whether results differ significantly or not between groups. For studies with a qualitative component, we will consider whether themes emerge separately for each group. For all articles, we will examine whether the discussion section includes implications separately for each group. We will use the GBA+ framework to ensure that we discuss the results and implications of our scoping review

Running head: Sexual health promotion for SGM in primary care

254 intentionally incorporating the elements of GBA+ principles. The GBA+ framework has been  
255 used in previous studies examining Canadian programs and policies. To our knowledge, there is  
256 one other scoping review by Eichler *et al.* (2021)<sup>40</sup> who utilized the GBA+ framework<sup>39</sup> to  
257 analyze research and government resources about military to civilian transition.

### 259 **Planned Dates**

260 The initial search was conducted on July 7 2020, and updated on May 31 2022, analysis is  
261 ongoing and completion of thematic analysis is anticipated for April 2023.

### 263 **Ethical Approval**

265 No ethical approval is required since our scoping review methods do not involve animals or  
266 human participants.

### 268 **Discussion**

270 This is a novel review of sexual health promotion interventions for sexual and gender minorities  
271 specifically within primary care settings. This review fits into broader work, including scoping  
272 reviews around general healthcare for adolescent sexual and gender minority populations in  
273 primary care<sup>41</sup>, integration of sex and gender considerations in health policy making<sup>42</sup>, care of  
274 SGM populations in the Emergency Department<sup>43</sup>, and how COVID-19 impacted sexual health  
275 for marginalized groups, including sexual and gender minorities<sup>44</sup>. Primary care represents a  
276 key setting of inquiry because it captures many social-ecological levels of influence for positive  
277 and sustainable sexual health outcomes, ranging from individual and relational to policy<sup>16-19</sup>.  
278 Findings can ground the implementation and scale-up of evidence-based interventions and the  
279 development of novel interventions to support and foster positive sexual health in sexual and  
280 gender minorities communities.

282 Our scoping review approach has several strengths. Our comprehensive search strategy includes  
283 a wide range of primary research modalities using quantitative, qualitative, and mixed methods.  
284 Studies included in secondary research, e.g., systematic reviews, that fit the selection criteria will  
285 also be included. Additionally, our search parameters and definitions of primary care and sexual  
286 health promotion are broad to better capture the diversity of the literature. Our analysis strategy  
287 is similarly comprehensive and multi-faceted with analysis of themes and content, the  
288 participants, such as gender, sexuality, and race/ethnicity as well as a socio-ecological levels.  
289 This analysis will offer rich insights into the different dimensions of potential research findings  
290 of the content, context, and participants.

292 Nevertheless, there are limitations. Our restriction to studies in economically-developed  
293 countries may limit generalizability to low-income settings. Similar efforts should be done for  
294 low- and middle-income countries, such as in India where there is significant work being done to  
295 improve care for sexual and general minority communities in primary care. In addition, by  
296 restraining the scope to interventions that operate within or in close connection to primary care,  
297 we may select for more biomedical interventions such as STI and HIV testing. This may exclude  
298 studies that focus on sexuality, relationships, and behaviour-based change when these may  
299 operate in settings outside of primary care (e.g., community-based organizations, bath houses,

Running head: Sexual health promotion for SGM in primary care

300 and private counselling). Furthermore, we acknowledge the contributions of medical fields  
301 outside of primary care settings that engage in work with SGM communities that are not  
302 captured in our review and represent important collective work.

### 304 **Conclusion and Dissemination**

305 We will publish our results of the review in an open access journal. The results will be presented  
306 at family medicine/health policy conferences at the local, national and international level, as well  
307 as community organizations and healthcare provider associations including the undergraduate  
308 medical level. Primary health care environments are well suited for creative and effective  
309 strategies for sexual health promotion that are tailored to sexual and gender minorities. The  
310 narrative descriptions, results and findings of this scoping review will help to identify areas of  
311 priority, improvement, and scale-up. By summarizing outcomes and success of interventions  
312 across key content themes results from our scoping review are expected to be of particular  
313 interest to primary care providers in high-income country settings. Public health policy experts  
314 and practitioners with a public health focus may find the anticipated results relating to the levels  
315 of interventions instructive. Community-based organizations that engage in sexual health  
316 promotion may benefit from new ideas suggested by the scoping review, or alternatively  
317 confirmation that existing strategies are evidence-based. Finally, gaps identified by the scoping  
318 review will provide opportunities for further work by researchers in the field, including  
319 development and trialing of new interventions within primary care environments for sexual and  
320 gender minorities.

### 321 **AUTHOR'S CONTRIBUTIONS**

322 PH and RT contributed equally to this paper as co-first authors. All contributing authors have  
323 seen and approved the final submitted version of the manuscript. The contribution of work is as  
324 follows: ANB, DHST, and JG developed the study question; JG and RT designed the protocol  
325 with ANB and DHST; CZ for the data acquisition by creating and implementing the search  
326 strategy; CF contributed to the design and drafting of the methods; AY provided substantial input  
327 and edits throughout the preparation of the paper; PH, RT, JG, DHST and ANB wrote the  
328 original draft of the manuscript; all authors provided input and approved the final version of the  
329 manuscript.

### 330 **FUNDING**

331 ANB is supported by a University of Toronto Department of Family and Community Medicine  
332 Non-Clinician Investigator award (N/A) and is a Canada Research Chair in Sexually Transmitted  
333 Infection Prevention (960-232826). D.H.S.T. is supported by a Tier 2 Canada Research Chair in  
334 HIV Prevention and STI Research (950-232641). Funding for development of the protocol was  
335 provided by the MAP Centre for Urban Health Solutions, St. Michael's Hospital, Unity Health  
336 Toronto (N/A), and a Canadian Institutes of Health Research foundation grant to ANB (FDN  
337 148432).

### 339 **COMPETING INTERESTS**

Running head: Sexual health promotion for SGM in primary care

PH, RT, JG, CZ, CF, AY, and ANB have no conflicts of interest. D.H.S.T.'s institution has received investigator-initiated research grants from Abbvie, Gilead and Viiv Healthcare. D.H.S.T. is a Site Principal Investigator for clinical trials sponsored by GlaxoSmithKline.

## **REFERENCES**

1. Daniel, H. & Butkus, R. Lesbian, gay, bisexual, and transgender health disparities: Executive summary of a policy position paper from the American College of Physicians. *ANN INTERN MED* **163**, 135–137 (2015).
2. Registered Nurses Association of Ontario. Promoting 2SLGBTQI+ Health Equity. (2021).
3. IOM (Institute of Medicine). *The Health of Lesbian, Gay, Bisexual, and Transgender People: Building a Foundation for Better Understanding*. (The National Academies Press).
4. US Department of Health and Human Services, National Healthcare Disparities Report 2011, Agency for Healthcare Research and Quality, Editor. 2012, AHRQ Publications: Rockville, MD.
5. Frost, D. M., Lehavot, K. & Meyer, I. H. Minority stress and physical health among sexual minority individuals. *J BEHAV MED* **38**, 1–8 (2015).
6. Ivankovich, M. B., Fenton, K. A. & Douglas, J. M. Considerations for National Public Health Leadership in Advancing Sexual Health. *PUBLIC HEALTH REP* **128**, 102–110 (2013).
7. Gabarron, E. & Wynn, R. Use of social media for sexual health promotion: a scoping review. *GLOBAL HEALTH ACTION* **9**, 32193–32193 (2016).
8. World Health Organization, Global Health Sector Strategy on Sexually Transmitted Infections 2016-2021: Towards Ending STIs. (2016).
9. Edwards, W. M. & Coleman, E. Defining Sexual Health: A Descriptive Overview. *Arch Sex Behav* **33**, 189–195 (2004).
10. World Health Organization. Sexual health and its linkages to reproductive health: an operational approach. (2017).

Running head: Sexual health promotion for SGM in primary care

- 1  
2  
3 365 11. Higgins, J. A., Carpenter, E., Everett BG, *et al*. Sexual minority women and contraceptive  
4  
5 366 use: Complex pathways between sexual orientation and health outcomes. *AM J PUBLIC*  
6  
7 367 *HEALTH* **109**, 1680–1686 (2019).
- 8  
9  
10 368 12. Scheim, A. I., Bauer, G. R. & Travers, R. HIV-Related Sexual Risk Among Transgender  
11  
12 369 Men Who Are Gay, Bisexual, or Have Sex With Men. *Journal of acquired immune deficiency*  
13  
14 370 *syndromes (1999)* **74**, e89–e96 (2017).
- 15  
16  
17 371 13. Tabaac AR, Sutter, ME. Wall, CSJ. *et al* . Gender Identity Disparities in Cancer Screening  
18  
19 372 Behaviors. *Am J Prev Med* 2018;54(3):385-393. *American journal of preventive medicine* **55**,  
20  
21 373 943–943 (2018).
- 22  
23  
24 374 14. Peitzmeier, S. M., Khullar, K., Reisner, S. L., & Potter, J., MD. Pap Test Use Is Lower  
25  
26 375 Among Female-to-Male Patients Than Non-Transgender Women. *AM J PREV MED* **47**, 808–  
27  
28 376 812 (2014).
- 29  
30  
31 377 15. Khalesi, Z. B., Simbar, M., Azin, S. A. & Zayeri, F. Public sexual health promotion  
32  
33 378 interventions and strategies: A qualitative study. *Electronic physician* **8**, 2489–2496 (2016).
- 34  
35  
36 379 16. Bronfenbrenner, U. *The ecology of human development : experiments by nature and*  
37  
38 380 *design*. (Harvard University Press, 1979).
- 39  
40 381 17. Batchelder, A. W., Gonzalez, J. S., Palma, A., *et al* Social Ecological Model of Syndemic  
41  
42 382 Risk affecting Women with and At-Risk for HIV in Impoverished Urban Communities. *Am J*  
43  
44 383 *Community Psychol* **56**, 229–240 (2015).
- 45  
46  
47 384 18. Aleshire, M. E., Ashford, K., Fallin-Bennett, A. & Hatcher, J. Primary Care Providers’  
48  
49 385 Attitudes Related to LGBTQ People: A Narrative Literature Review. *Health Promotion*  
50  
51 386 *Practice* **20**, 173–187 (2019).
- 52  
53  
54  
55  
56  
57  
58



Running head: Sexual health promotion for SGM in primary care

- 1  
2  
3 387 19. Condran, B., Gahagan, J. & Isfeld-Kiely, H. A scoping review of social media as a  
4  
5 388 platform for multi-level sexual health promotion interventions. *The Canadian journal of*  
6  
7 389 *human sexuality* **26**, 26–37 (2017).
- 8  
9  
10 390 20. Champion, J. D., Young, C. & Rew, L. Substantiating the need for primary care-based  
11  
12 391 sexual health promotion interventions for ethnic minority adolescent women experiencing  
13  
14 392 health disparities. *JAM ASSOC NURSE PRA* **28**, 487–492 (2016).
- 15  
16  
17 393 21. Gott, M., Galena, E., Hinchliff, S. & Elford, H. “Opening a can of worms”: GP and  
18  
19 394 practice nurse barriers to talking about sexual health in primary care. *FAM PRACT* **21**, 528–  
20  
21 395 536 (2004).
- 22  
23  
24 396 22. Khan, A., Plummer, D., Hussain, R. & Minichiello, V. Preventing sexually transmissible  
25  
26 397 infections in Australian general practice. *INT J STD AIDS* **19**, 459–463 (2008).
- 27  
28 398 23. Thompson, K. Casson K, Fleming P *et al.* Sexual health promotion in primary care –  
29  
30 399 activities and views of general practitioners and practice nurses. *Primary health care research*  
31  
32 400 *& development* **9**, 319–330 (2008).
- 33  
34  
35 401 24. Arksey, H. & O’Malley, L. Scoping studies: towards a methodological framework.  
36  
37 402 *International journal of social research methodology* **8**, 19–32 (2005).
- 38  
39  
40 403 25. Levac, D., Colquhoun, H. & O’Brien, K. K. Scoping studies: Advancing the  
41  
42 404 methodology. *IMPLEMENT SCI* **5**, 69–69 (2010).
- 43  
44  
45 405 26. Peters, M. Godfrey C, McInerney P, *et al.* Chapter 11: Scoping Reviews (2020 version).  
46  
47 406 in (JBI Manual for Evidence Synthesis, 2020).
- 48  
49 407 27. Tricco, A. C. Lillie E, Zarin W, *et al.* PRISMA extension for scoping reviews (PRISMA-  
50  
51 408 ScR): Checklist and explanation. *ANN INTERN MED* **169**, 467–473 (2018).
- 52  
53  
54  
55  
56  
57  
58

Running head: Sexual health promotion for SGM in primary care

- 1  
2  
3 409 28. Lockwood, C., dos Santos, K. B. & Pap, R. Practical Guidance for Knowledge Synthesis:  
4  
5 410 Scoping Review Methods. *Asian Nursing Research* **13**, 287–294 (2019).  
6  
7  
8 411 29. Peters, M. D. J. Marnie C, Tricco AC, *et al.* Updated methodological guidance for the  
9  
10 412 conduct of scoping reviews. *JBI evidence synthesis* **18**, 2119–2126 (2020).  
11  
12 413 30. Ivanski, C. & Kohut, T. Exploring definitions of sex positivity through thematic analysis.  
13  
14 414 *The Canadian Journal of Human Sexuality* **26**, 216–225 (2017).  
15  
16  
17 415 31. Khalil, H. & Kirschbaum, M. Adverse drug reactions in primary care: a scoping review  
18  
19 416 protocol. *JBI database of systematic reviews and implementation reports* **16**, 615–621 (2018).  
20  
21  
22 417 32. Hickson, M., Wanner, A. & Collinson, A. Dietitian-led clinics in primary care: A scoping  
23  
24 418 review protocol. *JBI database of systematic reviews and implementation reports* **17**, 2525–  
25  
26 419 2531 (2019).  
27  
28  
29 420 33. United Nations. World Economic Situation and Prospects 2019.  
30  
31 421 [https://www.un.org/development/desa/dpad/wp-content/uploads/sites/45/WESP2019\\_BOOK-](https://www.un.org/development/desa/dpad/wp-content/uploads/sites/45/WESP2019_BOOK-web.pdf)  
32  
33 422 [web.pdf](https://www.un.org/development/desa/dpad/wp-content/uploads/sites/45/WESP2019_BOOK-web.pdf) (2019).  
34  
35  
36 423 34. National Institutes of Health. Sexual & Gender Minority Health Disparities Research  
37  
38 424 Framework. (2021).  
39  
40 425 35. National Institute on Minority Health and Health Disparities. NIMHD Research  
41  
42 426 Framework. at [https://urldefense.proofpoint.com/v2/url?u=https-](https://urldefense.proofpoint.com/v2/url?u=https-3A__www.nimhd.nih.gov_about_overview_research-2Dframework.html&d=DwMFAg&c=XxU8ngzB_WPJXKyiin_6iQ&r=j75_ZyrDYsVgelArh-wka0X_EM-1uHd4xUnBRJ0mpTGg&m=y7zzZMQ_mjHuWenYkG_oI8ByXP-Yh46NfjXl0e7dB4&s=xsLnI-IUopheIlaRrD0s9X5tVkytV0JLleQ33KQjww4&e=)  
43  
44 427 [3A\\_\\_www.nimhd.nih.gov\\_about\\_overview\\_research-](https://urldefense.proofpoint.com/v2/url?u=https-3A__www.nimhd.nih.gov_about_overview_research-2Dframework.html&d=DwMFAg&c=XxU8ngzB_WPJXKyiin_6iQ&r=j75_ZyrDYsVgelArh-wka0X_EM-1uHd4xUnBRJ0mpTGg&m=y7zzZMQ_mjHuWenYkG_oI8ByXP-Yh46NfjXl0e7dB4&s=xsLnI-IUopheIlaRrD0s9X5tVkytV0JLleQ33KQjww4&e=)  
45  
46 428 [2Dframework.html&d=DwMFAg&c=XxU8ngzB\\_WPJXKyiin\\_6iQ&r=j75\\_ZyrDYsVgelArh](https://urldefense.proofpoint.com/v2/url?u=https-3A__www.nimhd.nih.gov_about_overview_research-2Dframework.html&d=DwMFAg&c=XxU8ngzB_WPJXKyiin_6iQ&r=j75_ZyrDYsVgelArh-wka0X_EM-1uHd4xUnBRJ0mpTGg&m=y7zzZMQ_mjHuWenYkG_oI8ByXP-Yh46NfjXl0e7dB4&s=xsLnI-IUopheIlaRrD0s9X5tVkytV0JLleQ33KQjww4&e=)  
47  
48 429 [wka0X\\_EM-1uHd4xUnBRJ0mpTGg&m=y7zzZMQ\\_mjHuWenYkG\\_oI8ByXP-](https://urldefense.proofpoint.com/v2/url?u=https-3A__www.nimhd.nih.gov_about_overview_research-2Dframework.html&d=DwMFAg&c=XxU8ngzB_WPJXKyiin_6iQ&r=j75_ZyrDYsVgelArh-wka0X_EM-1uHd4xUnBRJ0mpTGg&m=y7zzZMQ_mjHuWenYkG_oI8ByXP-Yh46NfjXl0e7dB4&s=xsLnI-IUopheIlaRrD0s9X5tVkytV0JLleQ33KQjww4&e=)  
49  
50 430 [Yh46NfjXl0e7dB4&s=xsLnI-IUopheIlaRrD0s9X5tVkytV0JLleQ33KQjww4&e=](https://urldefense.proofpoint.com/v2/url?u=https-3A__www.nimhd.nih.gov_about_overview_research-2Dframework.html&d=DwMFAg&c=XxU8ngzB_WPJXKyiin_6iQ&r=j75_ZyrDYsVgelArh-wka0X_EM-1uHd4xUnBRJ0mpTGg&m=y7zzZMQ_mjHuWenYkG_oI8ByXP-Yh46NfjXl0e7dB4&s=xsLnI-IUopheIlaRrD0s9X5tVkytV0JLleQ33KQjww4&e=) (2017).  
51  
52 431 Accessed 26 November 2022.  
53  
54  
55  
56  
57  
58

Running head: Sexual health promotion for SGM in primary care

- 1  
2  
3 432 36. Alvidrez, J., Castille, D., Laude-Sharp, *et al* The National Institute on Minority Health  
4  
5 433 and Health Disparities Research Framework. *Am J Public Health* **109**, S16–S20 (2019).  
6  
7  
8 434 37. Hightow-Weidman, L. B. & Budhwani, H. A multidimensional digital approach to  
9  
10 435 address vaccine hesitancy and increase COVID-19 vaccine uptake among African American  
11  
12 436 young adults in the south (R01MD016834). at  
13  
14 437 [https://www.nimhd.nih.gov/docs/research\\_framework/nimhdResearchFrameworkAdapt\\_High](https://www.nimhd.nih.gov/docs/research_framework/nimhdResearchFrameworkAdapt_HightowWeidman-Budhwani.pdf)  
15  
16 438 [towWeidman-Budhwani.pdf](https://www.nimhd.nih.gov/docs/research_framework/nimhdResearchFrameworkAdapt_HightowWeidman-Budhwani.pdf) (2021).  
17  
18  
19 439 38. Chuang, E., Yu, S., Georgia, A., *et al*. A Decade of Studying Drivers of Disparities in  
20  
21 440 End-of-Life Care for Black Americans: Using the NIMHD Framework for Health Disparities  
22  
23 441 Research to Map the Path Ahead. *Journal of Pain and Symptom Management* **64**, e43–e52  
24  
25 442 (2022).  
26  
27  
28 443 39. Treasury Board of Canada Secretariat. Integrating Gender-Based Analysis Plus into  
29  
30 444 Evaluation: A Primer. (2019).  
31  
32  
33 445 40. Eichler, M., Smith-Evans, K., Spanner, L. & Tam-Seto, L. Mind the gap: Sex, gender,  
34  
35 446 and intersectionality in military-to-civilian transitions. *Journal of Military, Veteran and*  
36  
37 447 *Family Health* **7**, (2021).  
38  
39  
40 448 41. Zanchetta, S. B. & Araujo da Silveira, E. A. Health Care for Sexual and Gender Minority  
41  
42 449 Adolescents: scoping review. *Research, Society and Development* **11**, (2022).  
43  
44  
45 450 42. Williams, A., Lyeo, J. S., Geffros, S. & Mouropoulos, A. The integration of sex and  
46  
47 451 gender considerations in health policymaking: a scoping review. *International Journal for*  
48  
49 452 *Equity in Health* **20**, (2021).  
50  
51  
52 453 43. Kruse, M. I. Bigham BL, Voloshin D, *et al*. Care of Sexual and Gender Minorities in the  
53  
54 454 Emergency Department: A Scoping Review. *Ann Emerg Med* **79**, 196–212 (2022).  
55  
56  
57  
58

Running head: Sexual health promotion for SGM in primary care

- 1  
2  
3 455 44. Kumar, N. Janmohamed, K. Nyhan, L. *et al.* Sexual health (excluding reproductive  
4 health, intimate partner violence and gender-based violence) and COVID-19: a scoping  
5 456  
6 health, intimate partner violence and gender-based violence) and COVID-19: a scoping  
7  
8 457 review. *Sex Transm Infect* **97**, 402 (2021).  
9  
10 458

11  
12  
13  
14  
15  
16  
17  
18  
19  
20  
21  
22  
23  
24  
25  
26  
27  
28  
29  
30  
31  
32  
33  
34  
35  
36  
37  
38  
39  
40  
41  
42  
43  
44  
45  
46  
47  
48  
49  
50  
51  
52  
53  
54  
55  
56  
57  
58  
59  
60

For peer review only

**Appendix 1**

Table 1: Developed Countries According to the United Nations 2019 Report

| North America           | Europe (European Union)                                                                                                                                                                                                                                                                                                             | Other Europe                     | Asia and Pacific                  |
|-------------------------|-------------------------------------------------------------------------------------------------------------------------------------------------------------------------------------------------------------------------------------------------------------------------------------------------------------------------------------|----------------------------------|-----------------------------------|
| Canada<br>United States | Austria<br>Belgium<br>Denmark<br>Finland<br>France<br>Germany<br>Greece<br>Ireland<br>Italy<br>Luxembourg<br>Netherlands<br>Portugal<br>Spain<br>Sweden<br>United Kingdom<br><br>Bulgaria<br>Croatia<br>Cyprus<br>Czech Republic<br>Estonia<br>Hungary<br>Latvia<br>Lithuania<br>Malta<br>Poland<br>Romania<br>Slovakia<br>Slovenia | Iceland<br>Norway<br>Switzerland | Australia<br>Japan<br>New Zealand |

**Appendix 2****Medline search strategy****Ovid MEDLINE: Epub Ahead of Print, In-Process & Other Non-Indexed Citations, Ovid MEDLINE® Daily and Ovid MEDLINE® <1946-Present>**

1 exp "Sexual and Gender Minorities"/ 12718  
 2 bisexuality/ or exp homosexuality/ 33767  
 3 transsexualism/ 4269  
 4 Gender Identity/ 20626

5 Transvestism/ 643  
 6 Gender Dysphoria/ 787  
 7 (two spirit\* or twospirit\* or 2spirit\* or 2-spirit\* or gender non conforming or gender  
 8 nonconforming or LGBT\* or GLBT\* or GSM or MSM or WSW or lesbian\* or gay\* or  
 9 bisexual\* or homosexual\* or transgender\* or transsexual\* or trans gender\* or trans sexual\* or  
 10 trans spectrum or transspectrum or queer\* or intersex\* or asexual\* or pansexual\* or omnisexual\*  
 11 or genderqueer or genderfluid or gender fluid or third gender or fourth gender or double sex or  
 12 doublesex or twin spirit\* or twinspirit\* or sexual\* minorit\* or pangender\* or non binary or  
 13 nonbinary or bigender\* or agender\* or trigender\* or pan gender\* or bi gender\* or tri gender\* or  
 14 mixed gender\* or nonheterosexual\* or non heterosexual\* or gender dysphori\* or lesbigay\* or  
 15 bicurious or cross sex or crossgender or cross gender or gender change or gender identi\* or  
 16 gender reassign\* or gender transition\* or gender variant or men who have sex with men or same  
 17 gender loving or same sex attracted or same sex couple\* or same sex relations or sex change\* or  
 18 sex reassign\* or sex transition\* or gender minorit\* or sexual identit\* or sexual orientation or  
 19 trans man or transman or transmen or trans men or trans male\* or transmale\* or trans female\* or  
 20 transfemale\* or trans woman or transwoman or trans women or transwomen or transpeople or  
 21 transperson\* or trans people or trans person\* or FTM trans\* or female to male trans\* or MTF  
 22 trans\* or male to female trans\* or F2M or transvestite\* or women loving women or women who  
 23 have sex with women or females who have sex with females or males who have sex with  
 24 males).tw,kf. 79667  
 25  
 26 8 1 or 2 or 3 or 4 or 5 or 6 or 7 102717  
 27 9 Primary Health Care/ 88098  
 28 10 Comprehensive Health Care/ 6753  
 29 11 exp General Practice/ 77507  
 30 12 Community Health Centers/ 7444  
 31 13 Community Health Services/ 32807  
 32 14 Child Health Services/ 21242  
 33 15 Community Mental Health Services/ 18946  
 34 16 exp Maternal Health Services/ 55680  
 35 17 exp Community Mental Health Centers/ 3306  
 36 18 Maternal-Child Health Centers/ 2335  
 37 19 Physicians, Family/ 16968  
 38 20 General Practitioners/ 9723  
 39 21 Physicians, Primary Care/ 4185  
 40 22 Ambulatory Care Facilities/ 21260  
 41 23 Outpatient Clinics, Hospital/ 15838  
 42 24 Outpatients/ 19655  
 43 25 Preventive Medicine/ 12012  
 44 26 primary care.tw,kf. 134345  
 45 27 primary healthcare.tw,kf. 8273  
 46 28 primary health care.tw,kf. 31426  
 47 29 Family practice\*.tw,kf. 8926  
 48 30 family medicine.tw,kf. 12686  
 49 31 general practitioner\*.tw,kf. 54979  
 50 32 family physician\*.tw,kf. 15836  
 51 33 family doctor\*.tw,kf. 5019

1  
2  
3 34 Community Health Centre\*.tw,kf. 1099  
4 35 Community Health Center\*.tw,kf. 3609  
5 36 Community Healthcare.tw,kf. 1145  
6 37 Community Health Care.tw,kf. 1320  
7 38 Community Health service\*.tw,kf. 2040  
8 39 ((outpatient\* or ambulatory or community) adj4 (clinic or clinics or healthcare or health  
9 care or centre\* or centers)).tw,kf. 79763  
10 40 (Family Health Group\* or Family Health Network\* or Family Health Organization\* or  
11 Family Health Team\* or integrated delivery network\* or Integrated Health Network\* or  
12 integrated physician network\* or Integrated Service Delivery Model\* or Physician Integrated  
13 Network\* or family Health Center\* or Family Health Centre\* or Family Medicine Unit\*).tw,kf.  
14 1298  
15 41 (medical home or medical homes).tw,kf. 3671  
16 42 exp Pharmacists/ 20219  
17 43 Pharmacies/ 9149  
18 44 (pharmacist\* or pharmacy or pharmacies).tw,kf. 80590  
19 45 or/9-44614862  
20 46 8 and 45 3614  
21 47 Sexual Health/2035  
22 48 exp Sexual Behavior/ 117936  
23 49 exp Sexually Transmitted Diseases/ 367290  
24 50 sexual partners/ 19519  
25 51 Pregnancy, Unplanned/ 2327  
26 52 exp Abortion, Induced/ 41794  
27 53 Reproductive Health/ 4569  
28 54 exp infertility/ or reproductive tract infections/ or exp sexual dysfunction, physiological/  
29 103470  
30 55 exp Papillomavirus Vaccines/9492  
31 56 sex counseling/ or sex education/ 9962  
32 57 Papanicolaou Test/ 7071  
33 58 exp Contraception/ 28691  
34 59 exp Contraceptive Devices/ 26611  
35 60 exp Reproductive Behavior/ 10003  
36 61 exp Intimate Partner Violence/ 12071  
37 62 exp Sexual Dysfunctions, Psychological/ 29078  
38 63 family planning services/ 25924  
39 64 exp Fertility/ 44610  
40 65 exp climacteric/ or exp reproduction/ 1267049  
41 66 Libido/4959  
42 67 Reproductive Rights/ 1079  
43 68 Rape/ 6707  
44 69 Sex Offenses/ 10671  
45 70 Sex Workers/ 2770  
46 71 exp Sex Reassignment Procedures/ 1216  
47 72 Health Services for Transgender Persons/ 187  
48 73 exp Hormone Replacement Therapy/ 26077  
49  
50  
51  
52  
53  
54  
55  
56  
57  
58  
59  
60

74 (sexual\* health\* or sexuality or sex\* education or sex\* counsel\* or sex\* therap\* or sexual relations\* or sex\* partner\* or sexual dysfunction\* or sexual violence or sexual wellbeing or sexual well being or sexual behavior\* or sexual behaviour\* or sexual risk\* or risk\* sex\* or sexual satisfaction or sexual pleasure or sexual\* assault\* or sexual problem\* or sex work\* or sex\* offen\* or rape or raped or sex reassign\* or sexual communication or reproductive health\* or reproductive behavior\* or reproductive behaviour\* or hormone replacement or hormone therapy or affirmative care or gender affirming care or Intercourse or contraception or contraceptive or condom or condoms or safe\* sex\* or unsafe sex\* or unplanned pregnanc\* or unintended pregnanc\* or unwanted pregnanc\* or abortion\* or birth control or fertility or infertil\* or family planning or intimate partner violence or menopause or andropause or sexually transmitted infection\* or sexually transmitted disease\* or STI or STIs or STD or STDs or HIV or AIDS or Human immunodeficiency virus or Acquired immune deficiency syndrome or Pre-Exposure Prophylaxis or Preexposure Prophylaxis Hepatitis A or Hepatitis B or Hepatitis C or chlamydia or Gonorrhoea or gonorrhoea or pelvic inflammatory disease or Trichomoniasis or papillomavirus infection\* or papillomavirus vaccin\* or HPV vaccin\* or syphilis or herpes genitalis or Chancroid or granuloma inguinale or condylomata accuminata or Bacterial Vaginosis or Cervical cancer or cervical neoplasm\* or cervical intra-epithelial neoplasia or uterine cervical dysplasia or dyspareunia or erectile dysfunction).tw,kf. 1135473

75 or/47-74 2352976

76 46 and 75 2909

77 exp canada/ or exp united states/ or europe/ or austria/ or belgium/ or europe, eastern/ or Bulgaria/ or exp baltic states/ or croatia/ or czech republic/ or hungary/ or poland/ or romania/ or slovakia/ or slovenia/ or exp france/ or exp germany/ or exp united kingdom/ or greece/ or ireland/ or exp italy/ or luxembourg/ or mediterranean region/ or mediterranean islands/ or cyprus/ or malta/ or netherlands/ or portugal/ or exp "scandinavian and nordic countries"/ or spain/ or switzerland/ or exp australia/ or iceland/ or new zealand/ or exp japan/ 3252008

78 (Australia\* or Austria\* or Belgium or Belgian\* or Canada\* or Canadian\* or Czech\* or Denmark or Danish or Estonia\* or Finland or Finnish or France or French or German\* or Greece or Greek or Hungar\* or Iceland\* or Italy or Italian\* or Japan\* or Latvia\* or Lithuania\* or Luxembourg or Malta or Maltese or Netherlands or Holland or Dutch or New Zealand\* or Norway or Norwegian\* or Poland or Polish or Portugal or Portuguese or Slovak\* or Slovenia\* or Spain or Spanish or Sweden or Swedish or Switzerland or Swiss or United Kingdom or UK or England or British or Ireland or Irish or Scotland or Scottish or Wales or Welsh or United States or America\* or USA or Bulgaria\* or Croatia\* or Cyprus or Romania\*).tw,kf. 2515782

79 african americans/ or american native continental ancestry group/ or alaska natives/ or indians, north american/ or inuits/ or oceanic ancestry group/ or asian americans/ or exp indigenous peoples/ or exp hispanic americans/ 119364

80 (canad\* or "british columbia" or "Colombie britannique" or alberta\* or saskatchewan or manitoba\* or ontario or quebec or "nouveau brunswick" or "nova scotia" or "nouvelle ecosse" or "prince edward island" or newfoundland or labrador or nunavut or nwt or "northwest territories" or yukon or nunavik or inuvialuit).tw,kf. 189983

81 77 or 78 or 79 or 80 4544737

82 76 and 81 1778

83 exp Africa/ or exp caribbean region/ or exp central america/ or latin america/ or exp south america/ or exp asia, central/ or exp asia, northern/ or exp asia, southeastern/ or exp asia,



1  
2  
3  
4  
5  
6  
7  
8  
9  
10  
11  
12  
13  
14  
15  
16  
17  
18  
19  
20  
21  
22  
23  
24  
25  
26  
27  
28  
29  
30  
31  
32  
33  
34  
35  
36  
37  
38  
39  
40  
41  
42  
43  
44  
45  
46  
47  
48  
49  
50  
51  
52  
53  
54  
55  
56  
57  
58  
59  
60

```

western/ or exp china/ or exp korea/ or exp mongolia/ or exp taiwan/ or exp USSR/
1396125
84 76 not 83 2536
85 82 or 84 2593
86 limit 85 to (english language and yr="2000 -Current") 1956

```

For peer review only

## Preferred Reporting Items for Systematic reviews and Meta-Analyses extension for Scoping Reviews (PRISMA-ScR) Checklist

| SECTION                                               | ITEM | PRISMA-ScR CHECKLIST ITEM                                                                                                                                                                                                                                                                                  | REPORTED ON PAGE #        |
|-------------------------------------------------------|------|------------------------------------------------------------------------------------------------------------------------------------------------------------------------------------------------------------------------------------------------------------------------------------------------------------|---------------------------|
| <b>TITLE</b>                                          |      |                                                                                                                                                                                                                                                                                                            |                           |
| Title                                                 | 1    | Identify the report as a scoping review.                                                                                                                                                                                                                                                                   | Click here to enter text. |
| <b>ABSTRACT</b>                                       |      |                                                                                                                                                                                                                                                                                                            |                           |
| Structured summary                                    | 2    | Provide a structured summary that includes (as applicable): background, objectives, eligibility criteria, sources of evidence, charting methods, results, and conclusions that relate to the review questions and objectives.                                                                              | Click here to enter text. |
| <b>INTRODUCTION</b>                                   |      |                                                                                                                                                                                                                                                                                                            |                           |
| Rationale                                             | 3    | Describe the rationale for the review in the context of what is already known. Explain why the review questions/objectives lend themselves to a scoping review approach.                                                                                                                                   | Click here to enter text. |
| Objectives                                            | 4    | Provide an explicit statement of the questions and objectives being addressed with reference to their key elements (e.g., population or participants, concepts, and context) or other relevant key elements used to conceptualize the review questions and/or objectives.                                  | Click here to enter text. |
| <b>METHODS</b>                                        |      |                                                                                                                                                                                                                                                                                                            |                           |
| Protocol and registration                             | 5    | Indicate whether a review protocol exists; state if and where it can be accessed (e.g., a Web address); and if available, provide registration information, including the registration number.                                                                                                             | Click here to enter text. |
| Eligibility criteria                                  | 6    | Specify characteristics of the sources of evidence used as eligibility criteria (e.g., years considered, language, and publication status), and provide a rationale.                                                                                                                                       | Click here to enter text. |
| Information sources*                                  | 7    | Describe all information sources in the search (e.g., databases with dates of coverage and contact with authors to identify additional sources), as well as the date the most recent search was executed.                                                                                                  | Click here to enter text. |
| Search                                                | 8    | Present the full electronic search strategy for at least 1 database, including any limits used, such that it could be repeated.                                                                                                                                                                            | Click here to enter text. |
| Selection of sources of evidence†                     | 9    | State the process for selecting sources of evidence (i.e., screening and eligibility) included in the scoping review.                                                                                                                                                                                      | Click here to enter text. |
| Data charting process‡                                | 10   | Describe the methods of charting data from the included sources of evidence (e.g., calibrated forms or forms that have been tested by the team before their use, and whether data charting was done independently or in duplicate) and any processes for obtaining and confirming data from investigators. | Click here to enter text. |
| Data items                                            | 11   | List and define all variables for which data were sought and any assumptions and simplifications made.                                                                                                                                                                                                     | Click here to enter text. |
| Critical appraisal of individual sources of evidence§ | 12   | If done, provide a rationale for conducting a critical appraisal of included sources of evidence; describe the methods used and how this information was used in any data synthesis (if appropriate).                                                                                                      | Click here to enter text. |



| SECTION                                       | ITEM | PRISMA-ScR CHECKLIST ITEM                                                                                                                                                                       | REPORTED ON PAGE #        |
|-----------------------------------------------|------|-------------------------------------------------------------------------------------------------------------------------------------------------------------------------------------------------|---------------------------|
| Synthesis of results                          | 13   | Describe the methods of handling and summarizing the data that were charted.                                                                                                                    | Click here to enter text. |
| <b>RESULTS</b>                                |      |                                                                                                                                                                                                 |                           |
| Selection of sources of evidence              | 14   | Give numbers of sources of evidence screened, assessed for eligibility, and included in the review, with reasons for exclusions at each stage, ideally using a flow diagram.                    | Click here to enter text. |
| Characteristics of sources of evidence        | 15   | For each source of evidence, present characteristics for which data were charted and provide the citations.                                                                                     | Click here to enter text. |
| Critical appraisal within sources of evidence | 16   | If done, present data on critical appraisal of included sources of evidence (see item 12).                                                                                                      | Click here to enter text. |
| Results of individual sources of evidence     | 17   | For each included source of evidence, present the relevant data that were charted that relate to the review questions and objectives.                                                           | Click here to enter text. |
| Synthesis of results                          | 18   | Summarize and/or present the charting results as they relate to the review questions and objectives.                                                                                            | Click here to enter text. |
| <b>DISCUSSION</b>                             |      |                                                                                                                                                                                                 |                           |
| Summary of evidence                           | 19   | Summarize the main results (including an overview of concepts, themes, and types of evidence available), link to the review questions and objectives, and consider the relevance to key groups. | Click here to enter text. |
| Limitations                                   | 20   | Discuss the limitations of the scoping review process.                                                                                                                                          | Click here to enter text. |
| Conclusions                                   | 21   | Provide a general interpretation of the results with respect to the review questions and objectives, as well as potential implications and/or next steps.                                       | Click here to enter text. |
| <b>FUNDING</b>                                |      |                                                                                                                                                                                                 |                           |
| Funding                                       | 22   | Describe sources of funding for the included sources of evidence, as well as sources of funding for the scoping review. Describe the role of the funders of the scoping review.                 | Click here to enter text. |

JBI = Joanna Briggs Institute; PRISMA-ScR = Preferred Reporting Items for Systematic reviews and Meta-Analyses extension for Scoping Reviews.

\* Where *sources of evidence* (see second footnote) are compiled from, such as bibliographic databases, social media platforms, and Web sites.

† A more inclusive/heterogeneous term used to account for the different types of evidence or data sources (e.g., quantitative and/or qualitative research, expert opinion, and policy documents) that may be eligible in a scoping review as opposed to only studies. This is not to be confused with *information sources* (see first footnote).

‡ The frameworks by Arksey and O'Malley (6) and Levac and colleagues (7) and the JBI guidance (4, 5) refer to the process of data extraction in a scoping review as data charting.

§ The process of systematically examining research evidence to assess its validity, results, and relevance before using it to inform a decision. This term is used for items 12 and 19 instead of "risk of bias" (which is more applicable to systematic reviews of interventions) to include and acknowledge the various sources of evidence that may be used in a scoping review (e.g., quantitative and/or qualitative research, expert opinion, and policy document).

From: Tricco AC, Lillie E, Zarin W, O'Brien KK, Colquhoun H, Levac D, et al. PRISMA Extension for Scoping Reviews (PRISMA-ScR): Checklist and Explanation. *Ann Intern Med.* 2018;169:467–473. doi: 10.7326/M18-0850.

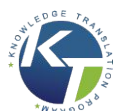

Supplement: bmjopen-2022-066704.draft_revisions.pdf [file bmjopen-2022-066704.draft_revisions.pdf]
