# Supplementary material for: Sexual health promotion for sexual and gender minorities in primary care: a scoping review protocol
Source: PubMed Central journal article supplement — BMJ Open. 2023 Mar 3;13(3):e066704. doi: 10.1136/bmjopen-2022-066704 (PMC9990650; doi:10.1136/bmjopen-2022-066704), 2023-03-03
Supplement: bmjopen-2022-066704supp001.pdf [file bmjopen-2022-066704supp001.pdf]

**Appendix 1**

Table 1: Developed Countries According to the United Nations 2019 Report

| North America           | Europe (European Union)                                                                                                                                                                                                                                                                                                             | Other Europe                     | Asia and Pacific                  |
|-------------------------|-------------------------------------------------------------------------------------------------------------------------------------------------------------------------------------------------------------------------------------------------------------------------------------------------------------------------------------|----------------------------------|-----------------------------------|
| Canada<br>United States | Austria<br>Belgium<br>Denmark<br>Finland<br>France<br>Germany<br>Greece<br>Ireland<br>Italy<br>Luxembourg<br>Netherlands<br>Portugal<br>Spain<br>Sweden<br>United Kingdom<br><br>Bulgaria<br>Croatia<br>Cyprus<br>Czech Republic<br>Estonia<br>Hungary<br>Latvia<br>Lithuania<br>Malta<br>Poland<br>Romania<br>Slovakia<br>Slovenia | Iceland<br>Norway<br>Switzerland | Australia<br>Japan<br>New Zealand |

**Appendix 2****Medline search strategy****Ovid MEDLINE: Epub Ahead of Print, In-Process & Other Non-Indexed Citations, Ovid MEDLINE® Daily and Ovid MEDLINE® <1946-Present>**

- 1 exp "Sexual and Gender Minorities"/ 12718
- 2 bisexuality/ or exp homosexuality/ 33767
- 3 transsexualism/ 4269
- 4 Gender Identity/ 20626

- 5 Transvestism/ 643
- 6 Gender Dysphoria/ 787
- 7 (two spirit\* or twospirit\* or 2spirit\* or 2-spirit\* or gender non conforming or gender nonconforming or LGBT\* or GLBT\* or GSM or MSM or WSW or lesbian\* or gay\* or bisexual\* or homosexual\* or transgender\* or transsexual\* or trans gender\* or trans sexual\* or trans spectrum or transspectrum or queer\* or intersex\* or asexual\* or pansexual\* or omnisexual\* or genderqueer or genderfluid or gender fluid or third gender or fourth gender or double sex or doublesex or twin spirit\* or twinspirit\* or sexual\* minorit\* or pangender\* or non binary or nonbinary or bigender\* or agender\* or trigender\* or pan gender\* or bi gender\* or tri gender\* or mixed gender\* or nonheterosexual\* or non heterosexual\* or gender dysphori\* or lesbigay\* or bicurious or cross sex or crossgender or cross gender or gender change or gender identi\* or gender reassign\* or gender transition\* or gender variant or men who have sex with men or same gender loving or same sex attracted or same sex couple\* or same sex relations or sex change\* or sex reassign\* or sex transition\* or gender minorit\* or sexual identit\* or sexual orientation or trans man or transman or transmen or trans men or trans male\* or transmale\* or trans female\* or transfemale\* or trans woman or transwoman or trans women or transwomen or transpeople or transperson\* or trans people or trans person\* or FTM trans\* or female to male trans\* or MTF trans\* or male to female trans\* or F2M or transvestite\* or women loving women or women who have sex with women or females who have sex with females or males who have sex with males).tw,kf. 79667
- 8 1 or 2 or 3 or 4 or 5 or 6 or 7 102717
- 9 Primary Health Care/ 88098
- 10 Comprehensive Health Care/ 6753
- 11 exp General Practice/ 77507
- 12 Community Health Centers/ 7444
- 13 Community Health Services/ 32807
- 14 Child Health Services/ 21242
- 15 Community Mental Health Services/ 18946
- 16 exp Maternal Health Services/ 55680
- 17 exp Community Mental Health Centers/ 3306
- 18 Maternal-Child Health Centers/ 2335
- 19 Physicians, Family/ 16968
- 20 General Practitioners/ 9723
- 21 Physicians, Primary Care/ 4185
- 22 Ambulatory Care Facilities/ 21260
- 23 Outpatient Clinics, Hospital/ 15838
- 24 Outpatients/ 19655
- 25 Preventive Medicine/ 12012
- 26 primary care.tw,kf. 134345
- 27 primary healthcare.tw,kf. 8273
- 28 primary health care.tw,kf. 31426
- 29 Family practice\*.tw,kf. 8926
- 30 family medicine.tw,kf. 12686
- 31 general practitioner\*.tw,kf. 54979
- 32 family physician\*.tw,kf. 15836
- 33 family doctor\*.tw,kf. 5019

- 34 Community Health Centre\*.tw,kf. 1099
- 35 Community Health Center\*.tw,kf. 3609
- 36 Community Healthcare.tw,kf. 1145
- 37 Community Health Care.tw,kf. 1320
- 38 Community Health service\*.tw,kf. 2040
- 39 ((outpatient\* or ambulatory or community) adj4 (clinic or clinics or healthcare or health care or centre\* or centers)).tw,kf. 79763
- 40 (Family Health Group\* or Family Health Network\* or Family Health Organization\* or Family Health Team\* or integrated delivery network\* or Integrated Health Network\* or integrated physician network\* or Integrated Service Delivery Model\* or Physician Integrated Network\* or family Health Center\* or Family Health Centre\* or Family Medicine Unit\*).tw,kf. 1298
- 41 (medical home or medical homes).tw,kf. 3671
- 42 exp Pharmacists/ 20219
- 43 Pharmacies/ 9149
- 44 (pharmacist\* or pharmacy or pharmacies).tw,kf. 80590
- 45 or/9-44614862
- 46 8 and 45 3614
- 47 Sexual Health/2035
- 48 exp Sexual Behavior/ 117936
- 49 exp Sexually Transmitted Diseases/ 367290
- 50 sexual partners/ 19519
- 51 Pregnancy, Unplanned/ 2327
- 52 exp Abortion, Induced/ 41794
- 53 Reproductive Health/ 4569
- 54 exp infertility/ or reproductive tract infections/ or exp sexual dysfunction, physiological/ 103470
- 55 exp Papillomavirus Vaccines/9492
- 56 sex counseling/ or sex education/ 9962
- 57 Papanicolaou Test/ 7071
- 58 exp Contraception/ 28691
- 59 exp Contraceptive Devices/ 26611
- 60 exp Reproductive Behavior/ 10003
- 61 exp Intimate Partner Violence/ 12071
- 62 exp Sexual Dysfunctions, Psychological/ 29078
- 63 family planning services/ 25924
- 64 exp Fertility/ 44610
- 65 exp climacteric/ or exp reproduction/ 1267049
- 66 Libido/4959
- 67 Reproductive Rights/ 1079
- 68 Rape/ 6707
- 69 Sex Offenses/ 10671
- 70 Sex Workers/ 2770
- 71 exp Sex Reassignment Procedures/ 1216
- 72 Health Services for Transgender Persons/ 187
- 73 exp Hormone Replacement Therapy/ 26077

74 (sexual\* health\* or sexuality or sex\* education or sex\* counsel\* or sex\* therap\* or sexual relations\* or sex\* partner\* or sexual dysfunction\* or sexual violence or sexual wellbeing or sexual well being or sexual behavior\* or sexual behaviour\* or sexual risk\* or risk\* sex\* or sexual satisfaction or sexual pleasure or sexual\* assault\* or sexual problem\* or sex work\* or sex\* offen\* or rape or raped or sex reassign\* or sexual communication or reproductive health\* or reproductive behavior\* or reproductive behaviour\* or hormone replacement or hormone therapy or affirmative care or gender affirming care or Intercourse or contraception or contraceptive or condom or condoms or safe\* sex\* or unsafe sex\* or unplanned pregnanc\* or unintended pregnanc\* or unwanted pregnanc\* or abortion\* or birth control or fertility or infertil\* or family planning or intimate partner violence or menopause or andropause or sexually transmitted infection\* or sexually transmitted disease\* or STI or STIs or STD or STDs or HIV or AIDS or Human immunodeficiency virus or Acquired immune deficiency syndrome or Pre-Exposure Prophylaxis or Preexposure Prophylaxis Hepatitis A or Hepatitis B or Hepatitis C or chlamydia or Gonorrhoea or gonorrhoea or pelvic inflammatory disease or Trichomoniasis or papillomavirus infection\* or papillomavirus vaccin\* or HPV vaccin\* or syphilis or herpes genitalis or Chancroid or granuloma inguinale or condylomata accuminata or Bacterial Vaginosis or Cervical cancer or cervical neoplasm\* or cervical intra-epithelial neoplasia or uterine cervical dysplasia or dyspareunia or erectile dysfunction).tw,kf. 1135473

75 or/47-74 2352976

76 46 and 75 2909

77 exp canada/ or exp united states/ or europe/ or austria/ or belgium/ or europe, eastern/ or Bulgaria/ or exp baltic states/ or croatia/ or czech republic/ or hungary/ or poland/ or romania/ or slovakia/ or slovenia/ or exp france/ or exp germany/ or exp united kingdom/ or greece/ or ireland/ or exp italy/ or luxembourg/ or mediterranean region/ or mediterranean islands/ or cyprus/ or malta/ or netherlands/ or portugal/ or exp "scandinavian and nordic countries"/ or spain/ or switzerland/ or exp australia/ or iceland/ or new zealand/ or exp japan/ 3252008

78 (Australia\* or Austria\* or Belgium or Belgian\* or Canada\* or Canadian\* or Czech\* or Denmark or Danish or Estonia\* or Finland or Finnish or France or French or German\* or Greece or Greek or Hungary\* or Iceland\* or Italy or Italian\* or Japan\* or Latvia\* or Lithuania\* or Luxembourg or Malta or Maltese or Netherlands or Holland or Dutch or New Zealand\* or Norway or Norwegian\* or Poland or Polish or Portugal or Portuguese or Slovak\* or Slovenia\* or Spain or Spanish or Sweden or Swedish or Switzerland or Swiss or United Kingdom or UK or England or British or Ireland or Irish or Scotland or Scottish or Wales or Welsh or United States or America\* or USA or Bulgaria\* or Croatia\* or Cyprus or Romania\*).tw,kf. 2515782

79 african americans/ or american native continental ancestry group/ or alaska natives/ or indians, north american/ or inuits/ or oceanic ancestry group/ or asian americans/ or exp indigenous peoples/ or exp hispanic americans/ 119364

80 (canad\* or "british columbia" or "Colombie britannique" or alberta\* or saskatchewan or manitoba\* or ontario or quebec or "nouveau brunswick" or "nova scotia" or "nouvelle ecosse" or "prince edward island" or newfoundland or labrador or nunavut or nwt or "northwest territories" or yukon or nunavik or inuvialuit).tw,kf. 189983

81 77 or 78 or 79 or 80 4544737

82 76 and 81 1778

83 exp Africa/ or exp caribbean region/ or exp central america/ or latin america/ or exp south america/ or exp asia, central/ or exp asia, northern/ or exp asia, southeastern/ or exp asia,

western/ or exp china/ or exp korea/ or exp mongolia/ or exp taiwan/ or exp USSR/  
1396125  
84 76 not 83 2536  
85 82 or 84 2593  
86 limit 85 to (english language and yr="2000 -Current") 1956
